# 1 Transcriptional changes suggest a major 2 involvement of Gibberellins in *Trifolium* 3 *pratense* regrowth after mowing

---

4 Short title: Gibberellin influences regrowth in red clover

5 Authors: Denise Brigitte Herbert (1)\*, Thomas Gross (1)\*, Oliver Rupp (2), Annette Becker (1)

6 \* These authors contributed equally to this work

7 Affiliations:

8 (1) Justus Liebig University, Institute of Botany, Heinrich-Buff-Ring 38, D-35392 Giessen, Germany

9 (2) Justus Liebig University, Department of Bioinformatics and Systems Biology, Heinrich-Buff-Ring  
10 26-32, D-35392, Giessen, Germany

11 Corresponding author: Denise Herbert (Denise.Herbert@bio.uni-giessen.de)

## 12 **Abstract**

13 Red clover (*Trifolium pratense*) is used worldwide as a fodder plant due its high nutritional value. In  
14 response to mowing, red clover exhibits specific morphological traits to compensate the loss of  
15 biomass. The morphological reaction is well described, but knowledge of the underlying molecular  
16 mechanisms are still lacking. Here we characterize the molecular genetic response to mowing of red  
17 clover by using comparative transcriptomics in greenhouse conditions and agriculturally used field.  
18 The analysis of mown and control plants revealed candidate genes possibly regulating crucial steps  
19 of the genetic network governing the regrowth reaction. In addition, multiple identified gibberellic

20 acid (GA) related genes suggest a major role for GA in establishing the regrowth morphology of red  
21 clover. Mown red clover plants showing this regrowth morphology were partially “rescued” by  
22 exogenous GA application, demonstrating the influence of GA during regrowth. Our findings provide  
23 insights into the physiological and genetic processes of mowing red clover, to serve as a base for red  
24 clover yield improvement.

25

## 26 **Introduction**

27 *Trifolium pratense* (red clover) is an important worldwide forage crop and thus of great economic  
28 interest. This perennial plant offers several advantages like a high protein content and soil improving  
29 characteristics, which can reduce the use of artificial nitrogen application and can enhance intake in  
30 livestock. Well-known disadvantages of red clover include poor persistence under several land use  
31 scenarios, like grazing or cutting [1–3]. *T. pratense* is a member of the Fabaceae (or legumes), which  
32 are, due to their economic value, among the most examined families in the plant kingdom with  
33 genome sequences available for species like *Medicago truncatula* (barrel clover) [4], *Lotus japonicus*  
34 (birdsfoot trefoil) [5], *Glycine max* (soy) [6], *Phaseolus vulgaris* (common bean) [7], *Cicer arietinum*  
35 (chickpea) [8], *Vigna unguiculata* (cowpea) [9], *Trifolium subterraneum* (subterranean clover) [10]  
36 *Trifolium medium* (zigzag clover) [11], and *T. pratense* (red clover) [12,13].

37 Facing today’s challenges such as an increased demand on food production in an era of global  
38 climate change together with the aim to solve these problems in an environmental friendly and  
39 sustainable way requires improvement of forage crops like *T. pratense* [14,15]. *T. pratense* breeding  
40 aims to offer genotypes with improved key agronomic traits (dry matter yield, high quality,  
41 resistance to diseases and abiotic/biotic stress, persistency, [16]), while improving its regrowth  
42 ability [2,17]. Unfortunately, the morphological investigations of several *T. pratense* populations  
43 showed a correlation of persistency with non-favorable traits, like small plant size and prostrate

44 growth habit [18]. Moreover, most *T. pratense* cultivars or accessions are locally adapted and  
45 require their specific local conditions to show the favored traits [19,20], which decreases the  
46 stability for individual traits in breeding efforts [21]. *T. pratense* exhibits significant intraspecific  
47 variation due to high intrapopulation genetic diversity, thus, persistence and performance in  
48 response to mowing or cutting, depends on the variety, as well as developmental stage at the  
49 moment of damage [22–25].

50 Persistency can be defined as a sustained forage yield over several growing periods [26] and is a  
51 complex trait influenced by a variety of abiotic and biotic factors, and the regrowth ability of a plant  
52 [27]. Plants with high regrowth ability can survive more frequent and intense biomass loss and could  
53 be therefore more persistent. Decapitation or biomass loss due to herbivory or mowing triggers a  
54 complex reaction affected by environmental conditions, plant morphology, architecture,  
55 developmental stage and genotype [22]. After decapitation, the first stress response in other  
56 legumes like *Medicago sativa* and *Pisum sativum* involves the production of phytohormones:  
57 cytokinin, auxin, and strigolactones [28–30]. In addition, the mobilization of energy reserves is  
58 activated [31]. Phenotypic plasticity of plant architecture in combination with alterations of  
59 hormone concentrations can be observed in *P. sativum* (pea) and *T. pratense* after decapitation  
60 [25,30,32]. However, the molecular processes allowing plants to thrive even after an enormous loss  
61 of biomass remain still unclear, even in *Arabidopsis thaliana* [33,34].

62 Here, we compare the transcriptomes of mown (cut) vs. unmown (uncut) *T. pratense* plants from  
63 two different field locations on the Biodiversity Exploratory “Heinich-Dün” [35] and greenhouse  
64 grown plants. Our field samples were subjected to standard agricultural treatment and we can thus  
65 discriminate transcriptional changes caused by abiotic factors and biotic interactions in the field  
66 from those regulating regrowth. We present the identification and *in silico* characterization of  
67 putative developmental regulators differentially expressed in the regrowth phase after mowing in  
68 the field and in the greenhouse that may contribute to the regrowth response of *T. pratense* and

69 demonstrate that gibberellic acid (GA) is a major regulator of specific aspects of the regrowth  
70 morphology in red clover.

71

## 72 **Material and Methods**

### 73 **Plant growth conditions, GA treatment, tissue sampling, and RNA extraction, cDNA** 74 **library construction and RNA-Seq**

75

76 Plant material for RNA-Seq was collected from three locations (fields and greenhouse, Fig. 1 A and  
77 table S1, thereby one field location includes two neighboring field sites). Field plant tissue for RNA-  
78 Seq was sampled on 11.06.2014 within the area of the Biodiversity Exploratory “Hainich-Dün” [35],  
79 located in Thuringia, Germany. Material was sampled on four neighboring sites; two mown pastures  
80 and two meadows that were not mown (FaM, FaNM, FbM, FbNM). For the greenhouse samples,  
81 seeds of regional *T. pratense* populations (from a region covering mainly Thuringia, Saxony, Saxony-  
82 Anhalt, Thuringian Forest and Uckermark, Germany) were obtained from the Rieger Hofmann seed  
83 company (Blaufelden, Germany). Plants were grown in 23 °C with 16 h of light in pots of 12 cm  
84 diameter. Plants in the greenhouse were watered daily and compound fertilizer (8’8’6’+) was given  
85 every ten days. After 122 days after sowing, half of the plants were cut to 5 cm (GM and GNM).  
86 Material from mown plants was sampled approximately 14 days after mowing/cutting, to avoid  
87 sequencing of the transcripts related to the first stress response [36]. After collection, the samples  
88 were snap frozen in liquid nitrogen. For each site and the greenhouse two biological replicates of  
89 four pooled plants (shoot and leaf material) each were collected.

90

91 Fig. 1: Overview of sampling locations and classification of DEGs. A: Overview of the sampling  
92 locations for the plant material. Names of the fields belonging to the Biodiversity Exploratory or  
93 greenhouse populations are shown, as well as the conditions (mown/cut and not mown/uncut, HG  
94 15 and HG 42; HG13 and HG 08). Distances between sampling locations in the field have been  
95 estimated. B-D: Classification of DEGs with a  $|\log_2\text{FoldChange}| < 2$ . Percentage share of each class to  
96 the corresponding gene list is shown in bar charts B: Classes of DEGs from field a mown vs. unmown.  
97 C: Classes of DE field b mown vs. not mown. D: Classes of DE contigs of mown plants grown in the  
98 greenhouse vs. unmown plants. E-F: Shared genes between the different treatments and locations.  
99 The Venn diagrams show the number of shared upregulated gene within the “mown” samples (E)  
100 and the number of shared genes within the “not mown” samples (F), blue circles indicate  
101 greenhouse data, green field a and red field b. G: Number of genes belonging to the class  
102 “phytohormones” within the DEG list of field (a and b) and greenhouse transcriptomes. The pie chart  
103 shows the number of the different plant phytohormones (abscisic acid, ABA; auxin, AUX; genes  
104 common between the auxin and cytokinin pathway, AUX/CK; cytokinin, CK; ethylene, ET;  
105 gibberellins, GA; jasmonic acid; JA; salicylic acid, SA).

106

107 RNA was extracted using NucleoSpin® RNA Plant Kit (Macherey-Nagel GmbH & Co. KG, Düren,  
108 Germany) according to the manufacturer’s instructions. Preparation of the cDNA libraries and the  
109 strand-specific sequencing was conducted by Eurofins Genomics (Ebersberg, Germany). The RNAs of  
110 four individuals were pooled for each RNA-Seq library and sequenced on an Illumina Hiseq2000  
111 platform with chemistry v3.0, creating 2x 100 bp paired end reads.

112 In order to assess the effect of GA during the regrowth reaction of *T. pratense*, 14 red clover plants  
113 were mown as described in [25]. Of these plants, seven were used as control plants and seven plants  
114 were sprayed with 100  $\mu\text{M}$  GA<sub>3</sub> (Duchefa Biochemie B.V, Haarlem, The Netherlands) once per week  
115 as described in [37]. Different morphological characters (leaf number, length/width of leaflets,

116 petiole length, number of inflorescences, and number of main shoots) were measured for four  
117 weeks.

118

## 119 **Assembly of reference transcriptome and annotation**

120

121 The raw-read-quality of the RNA-Seq data was analyzed with FastQC (available online at:  
122 <http://www.bioinformatics.babraham.ac.uk/projects/fastqc>). Illumina adapter and low quality  
123 regions were trimmed using Trimmomatic [38] with ILLUMINACLIP, SLIDINGWINDOW:5:20 and  
124 MINLEN:50 options. Quality trimmed reads were pooled and digitally normalized [39]. Multiple *de*  
125 *novo* assemblies were computed using Trinity [40] and Oases [41] with all odd k-mer parameters  
126 between 19 and 85. In addition, a genome guided assembly was performed using Trinity using the  
127 draft genome of *T. pratense* 1.0 (GCA\_000583005.2) [12,42]. The resulting contigs were screened for  
128 potential coding sequences (CDS) using TransDecoder (<https://transdecoder.github.io/>). The  
129 EvidentialGene pipeline ([http://arthropods.eugenesis.org/EvidentialGene/about/EvidentialGene](http://arthropods.eugenesis.org/EvidentialGene/about/EvidentialGene_trassembly_pipe.html)  
130 [\\_trassembly\\_pipe.html](http://arthropods.eugenesis.org/EvidentialGene/about/EvidentialGene_trassembly_pipe.html)) was used to merge and filter the contigs based on the TransDecoder CDS  
131 prediction. Completeness of the final contig was confirmed by computing the mapping-rate of the  
132 non-normalized reads to the contigs. The raw sequence reads can be found at NCBI: PRJNA561285.

133 The contigs were uploaded to the “Sequence Analysis and Management System” (SAMS) [43] for  
134 functional annotation with the SwissProt [44], TrEMBL [45] and Phytozome [46] (e-value cutoff of  
135 1e-5) databases. Additionally, attributes like gene name or functional description were extracted  
136 from the blast hits. Contigs were mapped to the *T. pratense* reference genome using gmap [47]. All  
137 non-Viridiplantae contigs were discarded. Transcription factors were identified using a blastp search  
138 of the protein sequences against the plant transcription factor database Potsdam (PlnTFDB) (48 [48],

139 version 3.0, <http://plntfdb.bio.uni-potsdam.de/v3.0/>) protein database with an e-value cutoff of 1e-  
140 20. The files contain the functional annotation description of all transcripts e-Appendix (Table S11).

141

## 142 **Differential gene expression analysis, enrichment analysis, and classification of** 143 **differentially expressed genes**

144

145 Read counts for each contig of the final assembly in each sample were computed using RSEM [49]  
146 with bowtie mapping. To identify differentially expressed *T. pratense* genes (DEG) a pairwise  
147 comparison of all treatments was performed using the DESeq2 [50] tool with  $FDR \leq 0.01$  and  
148  $|\log_2 \text{FoldChange}| \geq 2$  between FaM and FaNM, FbM and FbNM; GM and GNM respectively. The top  
149 20 DEG were determined for each comparison based on the expression strength (log<sub>2</sub> fold change).  
150 Homologues in the next closest species and *A. thaliana* for each *T. pratense* candidate gene were  
151 searched based on the *T. pratense* genome sequence deposited in Phytozome [46]. TPM (transcript  
152 per million) values were calculated to estimate contig expression level (Wagner et al 2012).

153 We used the description and gene names obtained from TrEMBLE and SwissProt to search the  
154 UniProt [51], NCBI [52] and TAIR [53] databases to obtain further information (Table S8). Raw reads  
155 that were assembled to contigs, exhibiting a gene structure (ORF) and attained a putative annotation  
156 referred to below as genes.

157

## 158 **Blast2Go Analysis of *T. pratense* genomes**

159

160 Two local BLAST searches [54] with word-size of 3, e-value of 1.0E-3 and HSP length cutoff of 33  
161 were performed against the PlnTFDB using Blast2GO [55]. Only the blast hits with the highest

162 similarity were used for further comparisons (number of BLAST hits = 1), sequences with similarity  
163 below 50% and an e-value higher than 1.0e-4 were omitted. The Blast2GO output was compared  
164 with an in-house python3-script utilizing NumPy (<https://numpy.org/>), Pandas  
165 (<https://pandas.pydata.org/>) and Seaborn (<https://seaborn.pydata.org/>) applying the list of  
166 transcription factors (TF) downloaded from PlnTFDB (<http://plntfdb.bio.uni-potsdam.de/v3.0/>) to  
167 the blast output and furthermore visualizing the generated datasets. We searched Uniprot database  
168 hits for development and phytohormone related genes. Subsequently, gene IDs of gibberellin genes  
169 we searched for matches within our annotated *T. pratense* transcriptomes. Matches were filtered  
170 based on TPM values and classified based on biosynthesis, catabolism activation/repression or  
171 signaling/response, corresponding expression patterns within the transcriptome have been  
172 identified additionally.

173

174

## 175 **Results**

### 176 **RNA-Seq results, *de novo* assembly, and functional description of contigs**

177

178 The RNA-Seq produced a total number of short reads between 44.7 and 58.1 million for each library  
179 with two exceptions (table S2) totaling 608,041,012 raw reads. The *de novo* assembly of the  
180 reference transcriptome of *T. pratense* produced 44,643 contigs, of which 41,505 contigs were  
181 annotated and 29,781 contigs were identified as plant specific. The minimum length of the contigs  
182 was 124 bp, the maximum length 1171.31 bp (Table S3). After the *de novo* assembly of the *T.*  
183 *pratense* transcriptome, each individual library was mapped back against the reference



184 transcriptome individually, to determine the overall alignment rate, which was between 77.85 % and  
185 90.32 % (Table S4).

186 63 % of the 44,643 contigs could be mapped to a known locus of the *T. pratense* genome annotation  
187 [12,42]. 32 % could be mapped to an unknown locus of the *T. pratense* genome and 5 % could not be  
188 mapped to the *T. pratense* genome (Fig. S1). All plant-specific contigs were annotated with several  
189 databases (Table S5). To further verify the quality of our replicates, we identified the transcripts  
190 shared by the two replicates. We identified TPM values for each transcript and discarded transcripts  
191 with TPM values <1. Then we compared the transcripts of each library with each other and  
192 calculated the percentage of this number compared with the total number of transcripts within each  
193 library. The percentage of transcripts shared between the two replicates is between 90 % and 94 %  
194 for all treatments/localities, suggesting that the RNA-Seq data are reproducible (Table S6).

## 195 **Specific transcriptional regulator families are differentially expressed during the** 196 **regrowth process**

197 We were firstly interested to identify transcriptional regulators initiating and maintaining the  
198 regrowth morphology and mapped the transcriptome to the PlnTFDB to identify these  
199 transcriptional regulators. All members of a specific transcriptional regulator family (TRF) were *in*  
200 *silico* identified in the transcriptome and their expression was compared between mown and  
201 unmown plants (Fig. S2). Only those TRFs are shown for which at least 10% of the members showed  
202 significantly differential expression between mown and unmown conditions (Fig. 2).

203

204 Fig. 2: Differentially expressed TRF members in mown and not mown *T. pratense* plants. The y-axis  
205 shows the number of expressed contigs (TPM value over 5 TPM) that are members of the specific  
206 TRF. Names of the transcriptomes and TRFs are given on the x-axis. Expression of transcription factor  
207 members was compared in a pairwise manner (GM vs GNM, FaM vs FaNM, FbM vs FbNM). Shown

208 are only those plant TRFs in which at least one of the comparisons resulted in a difference of more  
209 than 10% of the contigs significantly upregulated in either the mown or the unmown condition  
210 (orange bars).

211

212 17 TRFs were identified of which at least 10% of the members showed differential expression in the  
213 mown versus unmown comparisons (Fig. 2): ABI3VP1, AP2-EREBP, C<sub>2</sub>C<sub>2</sub>-Dof, C<sub>2</sub>C<sub>2</sub>-GATA, GRAS, HSF,  
214 LOB, MADS, mTERF, MYB, NAC, PHD, SBP, SNF2, TCP, TRAF, WRKY.

215 Two TRFs show expression activation upon mowing: a significant number of WRKY transcripts are  
216 up-regulated in mown plants regardless of the provenance. MADS-box transcripts were found  
217 upregulated as well, but only in the field-derived transcriptomes. Generally, only five of the 17 TRFs  
218 analyzed here showed significant changes in expression towards mowing in the greenhouse-derived  
219 plants suggesting that they react less strongly towards mowing than the field-derived plants. Six  
220 TRFs (AP2-EREBP, MYB, NAC, PHD, SBP, and TCP) show transcriptional changes in reaction to mowing  
221 only in field location a and three TRFs (mTERF, SNF2, TRAF) show this only in field location b  
222 suggesting that combination of biotic and abiotic factors with mowing differ between the two field  
223 locations.

224 Notably, only the C<sub>2</sub>C<sub>2</sub>-GATA TRF reacts towards mowing under greenhouse but not under field-  
225 conditions suggesting that transcriptional changes in reaction to other biotic and abiotic factors may  
226 overlay the regrowth reaction. Taken together, the TRF analysis shows that the reaction towards  
227 mowing induces transcriptional changes in only a subset of TRFs, suggesting that those play a major  
228 role in relieving the stress biomass loss and regrowth.

229

230 **Differentially expressed genes analysis reveals diverse subsets of genes involved**  
231 **in regrowth influenced by location and environmental conditions**

232

233 To identify gene expression responses underlying the regrowth response after mowing digital gene  
234 expression analysis was performed comparing FaM vs FaNM; FbM vs FbNM; GM vs GNM to identify  
235 DETs (Table S12) from mown plants. Interestingly, using the log fold change 2, the number of DEG is  
236 rather similar in all comparisons, ranging from 119 (Gm vs. GNM) to 142 (FaM vs. FaNM) (Table 1).

237

238 **Table 1 Table shows the numbers of differentially expressed transcripts (contigs) between libraries with changes above**  
239 **logfold 2. Up- or down regulation for each comparison is shown.**

| Analysis     | total<br>DEG | Number of transcripts up regulated<br>(library) | Number of transcripts down regulated<br>(library) |
|--------------|--------------|-------------------------------------------------|---------------------------------------------------|
| GM vs. GNM   | 119          | 54 (greenhouse mown)                            | 65 (greenhouse not mown)                          |
| FaM vs. FaNM | 142          | 49 (mown)                                       | 93 (not mown)                                     |
| FbM vs. FbNM | 122          | 59 (mown)                                       | 63 (not mown)                                     |

240

241 We were then interested to identify developmental processes in greater detail that are required for  
242 the regrowth process. Thus, the results of the DEG analysis were restructured such that the DEG  
243 were grouped in 16 descriptive classes by database and literature mining (Table S7 and Table S8).  
244 Those classes describe major functional groups and serve to identify the potential role of a gene.

245 The results of the top 20 DEG showed that the greenhouse plants displayed more DEG involved in  
246 regrowth processes and less genes related to environmental conditions when compared with field  
247 plants. Most likely, the greenhouse grown plants displayed the regrowth reaction more prominently,

248 as they grew under less stressful conditions than the field grown plants, for which more stress  
249 related DEG were observed (Fig. 1 B-D /Table 2-4).

250 **Table 2: Top twenty differentially expressed genes of GM vs. GNM analysis. The table shows the transcript name, log2 fold change of the corresponding transcript, the library in which the**  
 251 **transcript is upregulated (pattern), gene name based on *T. pratense* genome annotation, corresponding Phytozome description, gene name and species name of the next homologues and**  
 252 ***A. thaliana* gene name and locus name based on information available on Tair.**

| ID | Patt<br>ern | Contig ID  | log2<br>Fold<br>Chan<br>ge | Class (basis of classification)                                                         | Gene name <i>T. Pratense</i> | Next homologue<br>gene name | Next homologue<br>species name | <i>A. thaliana</i><br>gene name | <i>A. thaliana</i><br>locus name |
|----|-------------|------------|----------------------------|-----------------------------------------------------------------------------------------|------------------------------|-----------------------------|--------------------------------|---------------------------------|----------------------------------|
| 1  | GHN<br>M    | tdn_99733  | -9.5                       | Growth ( <i>M. truncatula</i> )                                                         | Tp57577_TGAC_v2_mRNA4544.v2  | Medtr4g029550.1             | <i>M. truncatula</i>           | -                               | -                                |
| 2  | GHN<br>M    | k41_54584  | -6.3                       | Biotic stress ( <i>T.pratense</i> , <i>M. truncatula</i> , <i>A. thaliana</i> )         | Tp57577_TGAC_v2_mRNA28349.v2 | Medtr5g073620.1             | <i>M. truncatula</i>           | ATEXO70B1                       | AT5G58430                        |
| 3  | GHN<br>M    | tdn_92791  | -5.5                       | Abiotic/biotic stress ( <i>T.pratense</i> , <i>M. truncatula</i> , <i>A. thaliana</i> ) | Tp57577_TGAC_v2_mRNA20498.v2 | Medtr1g041150.1             | <i>M. truncatula</i>           | ATCPK1                          | AT5G04870                        |
| 4  | GHN<br>M    | k41_130218 | -5.5                       | -                                                                                       | -                            | -                           | -                              | -                               | -                                |
| 5  | GHN<br>M    | tdn_53091  | -4.8                       | Phytohormone ( <i>M. truncatula</i> , <i>A. thaliana</i> )                              | Tp57577_TGAC_v2_mRNA39912.v2 | Medtr4g010250.1             | <i>M. truncatula</i>           | -                               | AT5G20190                        |
| 6  | GHN<br>M    | tgg_43136  | -4.4                       | Transcription ( <i>M. truncatula</i> , <i>A. thaliana</i> )                             | Tp57577_TGAC_v2_mRNA29629.v2 | Medtr4g098630.1             | <i>M. truncatula</i>           | ANAC071                         | AT4G17980                        |
| 7  | GHN         | tdn_141837 | -4.3                       | Abiotic stress ( <i>T.pratense</i> , <i>M. truncatula</i> , <i>A.</i>                   | Tp57577_TGAC_v2_mRNA760.v2   | Medtr2g022700.1             | <i>M. truncatula</i>           | ATGPT2                          | AT1G61800                        |

|    |     |            |      |                                                                       |                              |                 |                      |                   |           |
|----|-----|------------|------|-----------------------------------------------------------------------|------------------------------|-----------------|----------------------|-------------------|-----------|
|    | M   |            |      | <i>thaliana</i> )                                                     |                              |                 |                      |                   |           |
| 8  | GHN | tdn_40997  | -4.2 | Abiotic stress ( <i>T.pratense</i> , <i>M. truncatula</i> , <i>A.</i> | Tp57577_TGAC_v2_mRNA25718.v2 | Medtr4g130540.1 | <i>M. truncatula</i> | <i>HSP70B</i>     | AT1G16030 |
|    | M   |            |      | <i>thaliana</i> )                                                     |                              |                 |                      |                   |           |
| 9  | GHN | k71_5292   | -4.1 | Biotic stress ( <i>T.pratense</i> , <i>M. truncatula</i> )            | Tp57577_TGAC_v2_mRNA23166.v2 | Medtr0163s0020. | <i>M. truncatula</i> | <i>LECRK-IX.1</i> | AT5G10530 |
|    | M   |            |      |                                                                       |                              | 1               |                      |                   |           |
| 10 | GHN | k59_6358   | -3.9 | Growth ( <i>T.pratense</i> , <i>M. truncatula</i> , <i>A.</i>         | Tp57577_TGAC_v2_mRNA12337.v2 | Medtr3g435430.1 | <i>M. truncatula</i> | <i>ATEXP15</i>    | AT2G03090 |
|    | M   |            |      | <i>thaliana</i> )                                                     |                              |                 |                      |                   |           |
| 11 | GHM | tdn_86219  | 8.0  | Biotic stress ( <i>T.pratense</i> , <i>M. truncatula</i> , <i>A.</i>  | Tp57577_TGAC_v2_mRNA29036.v2 | Medtr4g066210.1 | <i>M. truncatula</i> | <i>BGLU12</i>     | AT5G42260 |
|    |     |            |      | <i>thaliana</i> )                                                     |                              |                 |                      |                   |           |
| 12 | GHM | k23_115785 | 8.0  | Abiotic stress ( <i>T.pratense</i> , <i>M. truncatula</i> , <i>A.</i> | Tp57577_TGAC_v2_mRNA22071.v2 | Glyma.01G00100  | <i>G. max</i>        | -                 | AT5G58110 |
|    |     |            |      | <i>thaliana</i> )                                                     |                              | 0.1             |                      |                   |           |
| 13 | GHM | tdn_91159  | 8.1  | Biotic stress ( <i>T.pratense</i> , <i>M. truncatula</i> , <i>A.</i>  | Tp57577_TGAC_v2_mRNA7745.v2  | Medtr4g035870.1 | <i>M. truncatula</i> | -                 | AT5G62360 |
|    |     |            |      | <i>thaliana</i> )                                                     |                              |                 |                      |                   |           |
| 14 | GHM | k65_43517  | 8.3  | Phytohormone ( <i>T.pratense</i> , <i>A. thaliana</i> )               | Tp57577_TGAC_v2_mRNA6281.v2  | Medtr1g082750.1 | <i>M. truncatula</i> | <i>ATAMI1</i>     | AT1G08980 |
| 15 | GHM | tgg_18067  | 8.4  | -                                                                     | Tp57577_TGAC_v2_mRNA32019.v2 | -               | -                    | -                 | -         |
| 16 | GHM | k61_38813  | 9.0  | -                                                                     | -                            | -               | -                    | -                 | -         |
| 17 | GHM | k49_82496  | 9.0  | Abiotic/biotic stress ( <i>G. max</i> , <i>A. thaliana</i> )          | Tp57577_TGAC_v2_mRNA37976.v2 | Glyma.06G26880  | <i>G. max</i>        | -                 | AT4G04790 |
|    |     |            |      |                                                                       |                              | 0.1             |                      |                   |           |

|    |     |           |     |                                      |                              |                 |                           |                |           |
|----|-----|-----------|-----|--------------------------------------|------------------------------|-----------------|---------------------------|----------------|-----------|
| 18 | GHM | k67_38815 | 9.1 | Biotic stress ( <i>T.pratense</i> )  | Tp57577_TGAC_v2_mRNA41666.v2 | Medtr0062s0020. | <i>M. truncatula</i>      | -              | -         |
|    |     |           |     |                                      |                              |                 |                           |                | 1         |
| 19 | GHM | k45_11164 | 9.6 | Transcription ( <i>T.pratense</i> )  | Tp57577_TGAC_v2_mRNA29953.v2 | Medtr3g092510.1 | <i>M. truncatula</i>      | <i>ATRBP37</i> | AT4G10610 |
| 20 | GHM | tdn_25484 | 9.6 | Growth ( <i>Phaseolus vulgaris</i> ) | Tp57577_TGAC_v2_mRNA13093.v2 | Phvul.006G03380 | <i>Phaseolus vulgaris</i> | -              | -         |
|    |     |           |     |                                      |                              |                 |                           |                | 0.1       |

253

254

255 **Table 3: Top twenty differentially expressed genes of FaM vs. FaNM analysis. The table shows the transcript name, log2 fold change of the corresponding transcript, the library in which**  
 256 **the transcript is upregulated (pattern), gene name based on *T. pratense* genome annotation, corresponding Phytozome description, gene name and species name of the next homologues**  
 257 **and *A. thaliana* gene name and locus name based on information available on Tair.**

| ID | Pattern | Contig ID | log2F | Class (basis of classification)                                  | Gene name <i>T. pratense</i> | Next homologue  | Next homologue       | <i>A. thaliana</i> | <i>A. thaliana</i> |
|----|---------|-----------|-------|------------------------------------------------------------------|------------------------------|-----------------|----------------------|--------------------|--------------------|
|    |         |           | oldCh |                                                                  |                              | gen name        | species name         | gene name          | locus name         |
|    |         |           | ange  |                                                                  |                              |                 |                      |                    |                    |
| 1  | TPNM2   | k33_17052 | -9,0  | Biotic stress ( <i>T. pratense, M. truncatula, A. thaliana</i> ) | Tp57577_TGAC_v2_mRNA21474.v2 | Medtr4g079440.1 | <i>M. truncatula</i> | na                 | AT1G06260          |
| 2  | TPNM2   | k43_11179 | -8,8  | Biotic stress ( <i>M. truncatula</i> )                           | Tp57577_TGAC_v2_mRNA26333.v2 | Medtr8g101900.1 | <i>M. truncatula</i> | CCOAOMT7           | AT4G26220          |
|    |         |           |       |                                                                  |                              |                 |                      |                    | 2                  |
| 3  | TPNM2   | tdn_34568 | -8,6  | -                                                                | Tp57577_TGAC_v2_mRNA9104.v2  | Glyma.13G06180  | <i>G. max</i>        | -                  | AT5G39530          |
|    |         |           |       |                                                                  |                              |                 |                      |                    | 0.1                |
| 4  | TPNM2   | tdn_49640 | -8,6  | -                                                                | -                            | -               | -                    | -                  | -                  |

|    |       |           |      |                                                                                  |                              |                          |                            |                   |           |
|----|-------|-----------|------|----------------------------------------------------------------------------------|------------------------------|--------------------------|----------------------------|-------------------|-----------|
| 5  | TPNM2 | tdn_58745 | -8,5 | Biotic stress ( <i>T. pratense</i> , <i>M. truncatula</i> , <i>A. thaliana</i> ) | Tp57577_TGAC_v2_mRNA20190.v2 | Medtr8g075200.1          | <i>M. truncatula</i>       | -                 | AT1G75900 |
| 6  | TPNM2 | tdn_47209 | -8,5 | Growth ( <i>M. truncatula</i> , <i>A. thaliana</i> )                             | Tp57577_TGAC_v2_mRNA10703.v2 | Medtr1g053315.1          | <i>M. truncatula</i>       | -                 | AT1G03390 |
| 7  | TPNM2 | tdn_48478 | -8,4 | Biotic stress ( <i>T. pratense</i> , <i>M. truncatula</i> , <i>A. thaliana</i> ) | Tp57577_TGAC_v2_mRNA19516.v2 | Medtr2g099020.1          | <i>M. truncatula</i>       | -                 | AT3G59510 |
| 8  | TPNM2 | k41_17597 | -8,4 | Growth stress ( <i>T. pratense</i> , <i>M. truncatula</i> , <i>A. thaliana</i> ) | Tp57577_TGAC_v2_mRNA8526.v2  | Medtr1g036490.1          | <i>M. truncatula</i>       | ATCOMT,<br>ATOMT1 | AT5G54160 |
| 9  | TPNM2 | k51_82581 | -8,2 | Growth ( <i>T. pratense</i> )                                                    | Tp57577_TGAC_v2_mRNA23127.v2 | Medtr2g436480.1          | <i>M. truncatula</i>       | KCS21             | AT5G49070 |
| 10 | TPNM2 | tdn_82424 | -8,1 | Growth ( <i>T. pratense</i> )                                                    | Tp57577_TGAC_v2_mRNA17103.v2 | Medtr2g013740.1          | <i>M. truncatula</i>       | KCS10             | AT2G26250 |
| 11 | TPM2  | k49_380   | 7,5  | Development ( <i>A. thaliana</i> )                                               | Tp57577_TGAC_v2_mRNA37185.v2 | SapurV1A.0885s0<br>040.1 | <i>Salix purpurea</i>      | DAYSLEEPER        | AT3G42170 |
| 12 | TPM2  | tdn_49869 | 7,6  | -                                                                                | -                            | -                        | -                          | -                 | -         |
| 13 | TPM2  | tdn_54983 | 7,7  | -                                                                                | -                            | -                        | -                          | -                 | -         |
| 14 | TPM2  | k37_9029  | 7,8  | -                                                                                | -                            | -                        | -                          | -                 | -         |
| 15 | TPM2  | k45_6120  | 8,4  | -                                                                                | Tp57577_TGAC_v2_mRNA2166.v2  | Medtr2g007510.1          | <i>M. truncatula</i>       | -                 | -         |
| 16 | TPM2  | k71_23808 | 8,4  | Development ( <i>T. pratense</i> , <i>M. truncatula</i> , <i>A. thaliana</i> )   | Tp57577_TGAC_v2_mRNA14131.v2 | Medtr1g021320.1          | <i>M. truncatula</i>       | -                 | AT4G33280 |
| 17 | TPM2  | k59_3541  | 8,4  | Development ( <i>T. pratense</i> , <i>M. truncatula</i> , <i>A. thaliana</i> )   | Tp57577_TGAC_v2_mRNA34193.v2 | Medtr4g089030.1          | <i>M. truncatula</i>       | CYP71A26          | AT3G48270 |
| 18 | TPM2  | k59_360   | 8,6  | Metabolism ( <i>Linum usitatissimum</i> , <i>T. pratense</i> )                   | Tp57577_TGAC_v2_mRNA21875.v2 | Lus10012445              | <i>Linum usitatissimum</i> | -                 | AT1G50020 |
| 19 | TPM2  | k53_38903 | 9,0  | Abiotic stress ( <i>A. thaliana</i> )                                            | Tp57577_TGAC_v2_mRNA37328.v2 | Medtr8g063190.1          | <i>M. truncatula</i>       | PRIN2             | AT1G10522 |



20    TPM2    tdn\_12997    9,6    -    Tp57577\_TGAC\_v2\_mRNA9318.v2    Medtr7g062280.1    *M. truncatula*    -    AT5G01140  
8

258

259    **Table 4: Top twenty differentially expressed genes of FbM vs. FbNM analysis. The table shows the transcript name, log2 fold change of the corresponding transcript, the library in which**  
260    **the transcript is upregulated (pattern), gene name based on *T. pratense* genome annotation, corresponding Phytozome description, gene name and species name of the next homologues**  
261    **and *A. thaliana* gene name and locus name based on information available on Tair.**

| ID | Patter<br>n | Contig ID  | log2<br>Fold | Class (basis of classification)                                                  | Gene name <i>T. pratense</i> | Next homologue<br>gen name | next homologue<br>species name | <i>A. thaliana</i><br>gene name    | <i>A. thaliana</i><br>locus name |
|----|-------------|------------|--------------|----------------------------------------------------------------------------------|------------------------------|----------------------------|--------------------------------|------------------------------------|----------------------------------|
| 1  | TPNM<br>3   | tdn_100726 | -9,4         | Biotic stress ( <i>T. pratense</i> , <i>M. truncatula</i> , <i>A. thaliana</i> ) | Tp57577_TGAC_v2_mRNA24659.v2 | Medtr4g094772.1            | <i>M. truncatula</i>           | <i>CYP81D</i>                      | AT4G37340                        |
| 2  | TPNM<br>3   | tgg_49631  | -8,0         | Biotic stress ( <i>T. pratense</i> , <i>M. truncatula</i> , <i>A. thaliana</i> ) | Tp57577_TGAC_v2_mRNA37846.v2 | Medtr6g034470.1            | <i>M. truncatula</i>           | -                                  | AT2G34930                        |
| 3  | TPNM<br>3   | tdn_152262 | -7,9         | -                                                                                | -                            | -                          | -                              | -                                  | -                                |
| 4  | TPNM<br>3   | tdn_56712  | -7,9         | Biotic stress ( <i>T. pratense</i> , <i>M. truncatula</i> )                      | Tp57577_TGAC_v2_mRNA30556.v2 | Medtr8g027540.1            | <i>M. truncatula</i>           | -                                  | -                                |
| 5  | TPNM<br>3   | tdn_87762  | -7,9         | Biotic stress ( <i>T. pratense</i> , <i>M. truncatula</i> , <i>A. thaliana</i> ) | Tp57577_TGAC_v2_mRNA10533.v2 | Medtr7g451400.1            | <i>M. truncatula</i>           | <i>ATMCP1B</i> ,<br><i>ATMCPB1</i> | AT1G02170                        |

|    |      |            |      |                                                                                           |                              |                       |                         |                                  |           |
|----|------|------------|------|-------------------------------------------------------------------------------------------|------------------------------|-----------------------|-------------------------|----------------------------------|-----------|
| 6  | TPNM | tdn_86129  | -7,1 | General cell functions ( <i>T. pratense</i> , <i>M. truncatula</i> , <i>A. thaliana</i> ) | Tp57577_TGAC_v2_mRNA10207.v2 | Glyma.11G15450<br>0.1 | <i>G. max</i>           | <i>RPB5E</i>                     | AT3G54490 |
| 7  | TPNM | k55_46241  | -6,9 | Growth ( <i>T. pratense</i> , <i>M. truncatula</i> , <i>A. thaliana</i> )                 | Tp57577_TGAC_v2_mRNA31452.v2 | Medtr4g128150.1       | <i>M. truncatula</i>    | <i>histone 4</i>                 | AT2G28740 |
| 8  | TPNM | tdn_55533  | -6,2 | Abiotic stress ( <i>T. pratense</i> , <i>M. truncatula</i> , <i>A. thaliana</i> )         | Tp57577_TGAC_v2_mRNA39263.v2 | Medtr5g007790.1       | <i>M. truncatula</i>    | <i>ATCRM1</i> ,<br><i>ATXPO1</i> | AT5G17020 |
| 9  | TPNM | tgg_51443  | -4,7 | Growth ( <i>T. pratense</i> , <i>M. truncatula</i> , <i>A. thaliana</i> )                 | Tp57577_TGAC_v2_mRNA37076.v2 | Medtr5g019580.2       | <i>M. truncatula</i>    | <i>UGT72E2</i>                   | AT5G66690 |
| 10 | TPNM | tdn_136706 | -4,7 | -                                                                                         | -                            | -                     | -                       | -                                | -         |
| 11 | TPM1 | tdn_140636 | 8,8  | General cell functions ( <i>T. pratense</i> , <i>M. truncatula</i> , <i>A. thaliana</i> ) | Tp57577_TGAC_v2_mRNA28209.v2 | Medtr8g005980.1       | <i>M. truncatula</i>    | <i>C-NAD-MDH2</i>                | AT5G43330 |
| 12 | TPM1 | tdn_154158 | 8,9  | General cell functions ( <i>T. pratense</i> , <i>M. truncatula</i> )                      | Tp57577_TGAC_v2_mRNA39482.v2 | Medtr3g114970.2       | <i>M. truncatula</i>    | -                                | AT5G55150 |
| 13 | TPM1 | tdn_65187  | 9,1  | Transposon ( <i>T. pratense</i> , <i>Prunus persica</i> A. <i>thaliana</i> )              | Tp57577_TGAC_v2_mRNA30115.v2 | Prupe.4G011200.<br>1  | <i>Prunus persica</i>   | -                                | AT4G29090 |
| 14 | TPM1 | tdn_100956 | 9,2  | Metabolism ( <i>T. pratense</i> , <i>Capsella rubella</i> , <i>A. thaliana</i> )          | Tp57577_TGAC_v2_mRNA9542.v2  | Carubv10008027<br>m   | <i>Capsella rubella</i> | <i>AHA2</i>                      | AT4G30190 |
| 15 | TPM1 | k63_21505  | 9,3  | Biotic stress ( <i>T. pratense</i> , <i>M. truncatula</i> , <i>A. thaliana</i> )          | Tp57577_TGAC_v2_mRNA19467.v2 | Medtr3g022400.1       | <i>M. truncatula</i>    | -                                | AT3G14470 |

|    |      |            |      |                                                                                                      |                              |                             |                       |   |           |
|----|------|------------|------|------------------------------------------------------------------------------------------------------|------------------------------|-----------------------------|-----------------------|---|-----------|
| 16 | TPM1 | tdn_142681 | 9,3  | Secondary metabolite biosynthesis ( <i>T. pratense</i> , <i>M. truncatula</i> , <i>A. thaliana</i> ) | Tp57577_TGAC_v2_mRNA15473.v2 | Medtr8g074550.1             | <i>M. truncatula</i>  | - | AT2G18570 |
| 17 | TPM1 | k45_6120   | 9,6  | -                                                                                                    | Tp57577_TGAC_v2_mRNA2166.v2  | Medtr2g007510.1             | <i>M. truncatula</i>  | - | -         |
| 18 | TPM1 | tdn_52922  | 10,1 | -                                                                                                    | Tp57577_TGAC_v2_mRNA41271.v2 | mrna20290.1-<br>v1.0-hybrid | <i>Fragaria vesca</i> | - | AT1G21280 |
| 19 | TPM1 | tdn_65185  | 10,9 | -                                                                                                    | -                            | -                           | -                     | - | -         |
| 20 | TPM1 | tdn_109277 | 11,7 | Transcription ( <i>T. pratense</i> , <i>M. truncatula</i> , <i>A. thaliana</i> )                     | Tp57577_TGAC_v2_mRNA29560.v2 | Medtr5g028610.1             | <i>M. truncatula</i>  | - | AT3G14460 |

262

263

264

265

266 Several functional groups show a similar pattern in the mown vs. unmown plants of all three  
267 locations: more genes related to biotic stress processes and metabolism were upregulated in the  
268 unmown locations (Fig. 1 B-D). In mown plants, more genes related to signaling and transposons  
269 were upregulated. Only a single functional group (growth) shows similar patterns in only the field  
270 locations suggesting that plants in the two field locations cope with very different habitat conditions  
271 and stress factors.

272 The photosynthesis- and phytohormone-related genes of field a show a similar pattern to the  
273 greenhouse plants as do the development- and signaling related genes. Genes related to  
274 development, general cell functions and transcription have similar patterns between field b and the  
275 greenhouse grown plants, such that more transcription - and development-related genes are  
276 upregulated in mown plants. DEG related to symbiosis were found upregulated in unmown plants  
277 grown in the greenhouse, even though these plants were fertilized. And unexpectedly, senescence-  
278 related genes are upregulated in mown plants of field A. However, because our analysis cannot  
279 discriminate between activating and repressing factors of senescence, we cannot conclude from our  
280 data if the mown plants have activated or repressed their senescence program.

281 The largest group of differentially expressed genes is the one related to biotic stress with up to 38%  
282 differentially expressed genes in one location (field b, Fig. 1 C). This suggests that different biotic  
283 stresses act upon the mown vs. unmown plants. A similar phenomenon can be observed for growth  
284 related processes, where up to 24% genes were upregulated in the mown and unmown plants  
285 indicating that different growth programs are active in mown vs. unmown plants.

286 Taken together we can state that mown plants in all locations change their regulatory programs  
287 upon mowing to cope with different biotic factors suggesting that they massively change their  
288 metabolism and signaling processes. Further, transposons are more active in mown plants. Apart

289 from these conclusions, the molecular answer to substantial biomass loss differs between all three  
290 locations.

291 To find similarly regulated genes between the treatments and/or locations, a Venn diagram was  
292 generated to compare the number of shared significantly DEG within the “mown” samples and the  
293 “not mown” samples (Fig. 1 E-F, Table S9). Within the “mown” samples we detected no overlap  
294 between the groups with the exception of four genes that are differentially expressed and  
295 upregulated in “mown” condition and are shared between the two field transcriptomes (FbM and  
296 FaM (Fig. 1 E). Within the “not mown” samples also four genes are shared between the field  
297 transcriptomes (FbNM and FaNM)) and one is shared between the field b and the greenhouse (Fig. 1  
298 F). No genes are shared between all three samples, neither in the “mown” treatment, nor in the “not  
299 mown” treatment. The genes that were shared between the transcriptomes belong to the main  
300 classes “growth”, “phytohormone”, “general cell functions”, “biotic stress”, “development” and  
301 “transcription” (Table S9).

302 Two of the genes could not be annotated. The annotated genes include for example genes  
303 tdn\_60472 (shared between FaM/FbM, class: phytohormone), that was found to be the homolog of  
304 the *A. thaliana* locus AT1G75750, describing a GA-responsive GASA1 protein homolog. Another *A.*  
305 *thaliana* homolog was identified, Chitinase A (ATCHIA), shared between FaNM/FbNM (tdn\_129843,  
306 class: biotic stress). In addition one gene was found, with a *T. pratense* annotation but no further  
307 description or homologs to *A. thaliana* (k45\_6120, shared between FaM/FbM). This suggests that  
308 the molecular mechanisms directing regrowth overlaid by other processes, such as stress response  
309 which have a more dramatic impact on the number of DEG than growth processes have. The shared  
310 genes between the field conditions and the almost complete absence of shared genes between field  
311 and greenhouse indicates that the growth conditions in the field are more like each other, even  
312 when the fields are far apart from each other than any field to a greenhouse.

313

## 314 **Gibberellins are major players in the regrowth reaction**

315

316 As phytohormones play a major role in the regulation of development and stress response, we  
317 identified DEGs related to phytohormone synthesis, homeostasis, transport, and signaling within all  
318 transcriptome comparisons (Table 1). DEG links for all major classes of phytohormones were  
319 identified, except for strigolactone. DEGs association to four phytohormones was most abundant:  
320 abscisic acid (ABA, 8 DEGs), gibberellins (GA, 8 DEGs), salicylic acid (SA, 6 DEGs), and auxin (AUX, 5  
321 DEGs) (Fig. 1 G). While ABA and SA are mainly involved in response to biotic and abiotic stresses, and  
322 AUX is known to play a major role in growth and development, we identified GA as a novel candidate  
323 phytohormone for regrowth response.

324 To learn more about the role of GA in the regrowth response, we identified 32 GA-related genes out  
325 of 151 within the transcriptomes of the greenhouse and the field grown plants, matching our  
326 selection criteria (TPM <5, involved in GA biosynthesis, signaling, GA responsive genes or catabolism,  
327 displaying certain expression patterns Fig. 3 A) and classified them according to their function in the  
328 GA biosynthesis and signaling processes (Table S13). Ranges of expression strength were calculated  
329 and color coded to compare expression patterns (Fig. 3 A).

330

331 Fig. 3: Analysis of GA related contigs and regrowth processes. A) Differentially expressed GA-related  
332 contigs within the *T. pratense* transcriptomes. Ranges of expression were calculated (0-39.99% blue  
333 (low expression), 40-59.99% grey (neutral expression), 60-100% yellow (high expression)) according  
334 to their TPM values. On the left, the gene names of the *T. pratense*'s closest *A. thaliana* homologs  
335 are given if available. B) and C) show morphological changes in leaves after GA treatment. B) leaflet  
336 area in cm<sup>2</sup>, C) length of petioles in cm. The graphs show average values for each sampling date and  
337 95% confidence interval. GA treated plants, blue; control plants, orange.

338

339 Five genes predicted to be involved in GA biosynthesis and signaling show similar expression  
340 differences between mown and unmown plants from at least two of the three locations:  
341 *tdn\_142825* (AT2G46590) and the homologs of *ZHD1*, *GID1B*, *MPT1*, and *MPT3*. Further, homologs  
342 of three GA responsive genes (*tdn\_75969* (*MYB 44*, AT5G67300), *tdn\_157683* (Os04g0670200,  
343 AT1G47128), and *XERICO* and homologs of two GA catabolism genes (*GA2OX1*, *GA2OX8*) react  
344 towards mowing. Interestingly, we also find many differences in expression between the field sites  
345 in the GA related genes suggesting fundamental differences in the living conditions between the two  
346 field sites that also impact regrowth after biomass loss.

347 When considering only the greenhouse grown plants, homologs of GA biosynthesis genes were not  
348 differentially regulated, but genes most likely involved in GA signaling such as *MPT1*, *MPT3*, and  
349 *SOC1* are down regulated in mown plants. Five homologs of GA responsive genes are upregulated in  
350 the mown plants, while three, among them *XERICO*, are down regulated. Further, of the three  
351 *GA2OXIDASE8* homologs encoded by the *T. pratense* genome, two are differentially expressed, one  
352 up- and the other down regulated upon mowing. Also, one *GA2OXIDASE1* homolog is down  
353 regulated in mown plants.

354 In summary, this suggests a highly dynamic response of several GA-related genes to mowing *or T.*  
355 *pratense*. Interestingly, we were unable to identify larger changes in the GA biosynthesis pathway of  
356 the greenhouse plants, but in GA catabolism genes, suggesting that GA availability in response to  
357 mowing is regulated by catabolism and signaling rather than by biosynthesis. Further, we identified  
358 two contrastingly regulated sets of genes acting in the mowing response.

### 359 **GA treatment after mowing induces specific changes to the regrowth response**

360

361 Identification of several GA related genes that changed expression suggested an involvement of GA  
362 in the regulation of development after mowing. We were interested to corroborate this hypothesis  
363 experimentally and treated *T. pratense* plants with GA after mowing. Weekly GA application during  
364 the regrowth process led to significant and specific changes in morphology (Fig. 3 B, C). Previous  
365 work suggested that regrowing plants produce smaller and rounder leaflets with shorter petioles  
366 than uncut plants [25]. Number of leaves, shoots and inflorescences, leaf area and the roundness of  
367 leaflets were measured (Fig. 3 B, C, Suppl. Fig. 3). The first visible effects of GA treatment were  
368 recognized after 1.5 weeks, showing a significant difference in leaflet area between GA treated and  
369 control plants. Later it was observed that the petioles of treated plants were in average twice as long  
370 as petioles of untreated plants ( $16.7 \pm 1.9$  cm and  $8 \pm 1.2$  cm, respectively). GA leaflets were with  $4.7$   
371  $\pm 0.9$  cm<sup>2</sup> almost double the size than those of untreated plants ( $2.4 \pm 0.6$  cm<sup>2</sup>). However, GA treated  
372 plants grew only 30% more total leaf area than control plants, because the control plants had more  
373 leaves than GA treated plants (Fig. S3 A, B, F, and G). Other morphological traits such as number of  
374 inflorescences, leaves, and shoots remained unaffected by the GA treatment. In summary, mown  
375 plants normally produce leaves with shorter petioles, restrict their leaflet area and their leaves  
376 become rounder. GA treatment partially alleviated these developmental changes such that the  
377 mown, GA treated plants produced larger leaves with longer petioles while the leaf shape was  
378 unaffected by GA treatment.

379

## 380 **Discussion**

### 381 **RNA-Seq and assembly**

382



383 The *de novo* assembly in combination with a reference-based approach for the annotation led to  
384 44643 contigs of which 29781 could be annotated as plant-specific (Fig. S1). With the prior *de novo*  
385 assembly it was possible to attain 4051 additional contigs that could be not found within the  
386 genome of *T. pratense* 1.0 (GCA\_000583005.2) [12,42]. The estimated genome size of *T. pratense* is  
387 ~440 Mbp [28]. The *T. pratense* transcriptome data in study was ~55 Mbp in size, corresponding to  
388 ~12.5% transcribed regions in the *T. pratense* genome, which is within the range of previously  
389 published transcriptomes (~10% (42 Mbp) [56]). Interestingly, we found plant-specific, previously  
390 unreported contigs suggesting that the *T. pratense* genome might need improvement in terms of  
391 sequencing coverage and protein coding sequence annotation.

## 392 **Cell walls are remodeled after mowing**

393

394 Our data analysis shows that several plant TRFs are predominantly involved in the regrowth reaction  
395 (Fig. 2 and S2). After massive biomass loss like mowing inflicts on *T. pratense*, plants firstly need to  
396 seal wounded tissues. Several transcriptional regulators are known to play a role in the tissue  
397 reunion processes were identified in *Solanum lycopersicum*, *Cucumis sativus*, and *A. thaliana*  
398 (reviewed in [36]). Homologs of these genes were also identified to be differentially regulated in the  
399 *T. pratense* transcriptome after mowing, such as several members of the Auxin Response Factor  
400 (ARF) family or the No Apical Meristem (NAM) family member *ANAC071*. [57] suggested that high  
401 levels of AUX induce the expression of *ANAC071* via ARF6 and ARF8 (in the upper part of incised  
402 stems), at the same time reduced AUX level directly after the cutting activate the expression of  
403 *RAP2.6L*. In addition auxin signaling via ARF6 and ARF8 influences JA synthesis, via the activation of  
404 *DAD1*, thus together with LOX2 increases *RAP2.6L* expression during tissue reunion in *A. thaliana*  
405 [57]. Further it was demonstrated that *ANAC071* can as a transcription factor initiate the expression  
406 of members of xyloglucan endotransglucosylase/hydrolases family (XTH20 and XTH19) which  
407 recombine hemicellulose chains to drives the cell proliferation during tissue reunion [58].

408 Interestingly, we were able to identify all members of the cell wall remodeling pathway mentioned  
409 above, displaying distinct expression pattern with some of them upregulated in mown plants  
410 including for example *XTH32* (k69\_7012, upregulated in FbM, tdn\_94651, upregulated in GM, FaM  
411 and FbM), *XTH6* (tdn\_91763, upregulated in GM), *XTH8* (k71\_5058, upregulated in GM, FbM), *XTH9*  
412 (tdn\_113578, upregulated in GM), *XTHA* (tdn\_87930, upregulated in GM), *LOX2* (tdn\_156279,  
413 upregulated FbM), and *ARF8* (tdn\_156886 upregulated in GM, tdn\_156890 upregulated in GM)  
414 (Table S10, S12 and S13). This is suggesting that the early steps in the regrowth reaction are  
415 conserved in core eudicots and that the cell wall remodeling processes continue at least two weeks  
416 after mowing.

#### 417 **Biotic and abiotic stresses contribute to differential gene expression**

418

419 RNA-Seq experiments create a large amount of raw data which requires significant downstream  
420 analysis to provide a biologically meaningful dataset. We thus compared those 20 genes, that  
421 differed most strongly in their expression between the different treatments and locations (see table  
422 4-6 and Fig. 1 B-D). These comparisons revealed that the mown greenhouse plants show the highest  
423 percentage of genes possibly involved in regrowth processes. Contrasting, the field transcriptomes  
424 display patterns of abiotic and biotic stress reactions. Comparisons of the top 20 DEG of the  
425 unmown field transcriptomes showed that plants grown on field a and b face biotic stress more than  
426 abiotic stress. One of the upregulated genes in field a is a chitinase homolog suggesting that those  
427 plants are under attack of fungi and/or insects. Follow-up analyses to correlate environmental  
428 conditions, biotic and abiotic stresses monitored within the Biodiversity Exploratories with  
429 differential gene expression at the two field locations would be an interesting project but are  
430 beyond the scope of this work. In contrast, the top 20 DE transcripts of the greenhouse plants  
431 include phytohormone- and transcription-related genes, but also a high proportion of biotic and  
432 abiotic stress-related genes. This suggests that also these plants have to cope with stresses, but to a

433 lesser extent. Thus, their regrowth reaction is more visible within the top 20 DEG. Generally, the  
434 non-mown plants show a much higher number of upregulated biotic stress-related genes during a  
435 phase in their life when senescence commences and they become more susceptible to pathogen  
436 attacks. The mown plants during their regrowth phase are not senescing and their younger organs  
437 seem be less affected by pathogens.

438

439

#### 440 **GA related genes influence regrowth of *T. pratense***

441 GAs are involved in multiple aspects of plant development like cell elongation, flowering time  
442 regulation, and seed germination. Consequently, genes encoding for proteins involved in the  
443 synthesis, perception, and catabolism of the various GAs influence plant form. The RNA-Seq data  
444 presented showed a high abundance of GA associated genes (Fig. 1 G and 3) which might explain the  
445 morphological changes to mowing, such as rounder leaves, temporary dwarf-like appearance, and  
446 higher cumulative biomass production in mown plants [25]. Two of the genes, expressed higher in  
447 mown plants than in control clover plants are *GA20OX1* and *GA20OX2*. They are key enzymes of GA  
448 synthesis by producing precursors of the active GA forms (reviewed in [59]) and a deficiency in their  
449 activity is correlated with a dwarfed growth phenotype in *A. thaliana* and *O. sativa* [60,61]. These  
450 mutants show also slow down cell division and expansion rate [62]. The upregulation of *GA20OX2* in  
451 mown plants may meet the enhanced demand of active GA to promote and sustain the regrowth to  
452 increase cell division and elongation. Similar to an increased GA synthesis, the expression of genes  
453 involved in reception of GA, such as the ortholog of *AtGID1B* is enhanced in mown plants. In *A.*  
454 *thaliana*, loss-of-function mutants of this GA receptor show a dwarfed phenotype [63] and over-  
455 expression of *GID1* in *Medicago sativa* promotes biomass accumulation and leaf roundness [64].

456 In contrast to these GA responsive genes, GA2OX2 and GA2OX8 are involved in GA catabolism [65]  
457 and high levels of GA are known to activate the expression of degrading enzymes [66]. Both genes  
458 are expressed higher in not mown control plants than in mown plants and they inactivate the  
459 bioactive GAs GA2OX over-expression results in stunted plants and delayed flowering time [67,68].  
460 While mown clover plants show a higher expression of genes associated with growth activation, the  
461 ABA biosynthesis regulator XERICO is higher expressed in unmown plants (Table S13). It is a direct  
462 target of the DELLA protein RGL2 and in addition negatively regulated by GID1B [69,70]. Thus,  
463 XERICO might restrict GA mediated growth to confer the drought adaptation of the not mown plants  
464 as more water is lost through the high leaf biomass.

465 In summary, mowing seems to trigger differential gene expression of GA activating enzymes and  
466 catabolic enzymes suggesting a dynamic GA response, but the gene expression patterns were not  
467 informative in respect to the consequences for the phenotype. When analyzing the morphological  
468 effects of GA application to mown plants (Fig. 3 A-C) we could show that external GA application  
469 lead to the disappearance of specific traits typical of the mowing response. Mown plants develop  
470 shorter petioles and produce a smaller leaf size area [25], but when treated with GA, leaves and  
471 petioles grow up the size seen in unmown plants.

472 The growth promoting abilities of GAs by cell expansion and proliferation via stimulating the  
473 degradation of growth-repressing DELLA proteins are well established [62]. The length increase of  
474 petioles in GA treated mown plants is in line with reported data from non-mown *Pisum sativum*  
475 (pea) plants, but in those, leaf sizes remained unchanged after GA treatment [71], suggesting a more  
476 specific role for GA in the regrowth reaction after biomass loss. Moreover, it was shown in *A.*  
477 *thaliana* previously, that elevated GA concentrations enhance cell division rates in the distal end of  
478 leaves (reviewed in [72]). If these results are transferred to *T. pratense* GA treatment should result in  
479 longer leaflets after GA treatment of mown plants. However, the leaf shape did not change, only the

480 size increased suggesting a regrowth-specific shift of growth pattern which is unaffected by GA but  
481 similar to leaf shape of juvenile plants [25].

482 Interestingly, GA treatment of mown *T. pratense* plants does not generally lead to stronger  
483 longitudinal growth as leaves retained the round shape characteristic for untreated mown plants.  
484 These regrowth-specific characteristics can also be found in other species, for example in *A.*  
485 *thaliana*, *Fragaria ananassa*, *Duchesnea indica* and *G. max* GA treatment causes elongated petioles  
486 and increased leaf sizes and a more erect growth habit [73–76]. This proposes a new method to  
487 increase the accumulation of biomass, suitable for animal fodder. Previous experiments with the  
488 grasses *Leymus chinensis* and *Lolium perenne* showed GA action to be limited by N fertilization  
489 [77,78]. Red clover, living in symbiosis with nitrogen fixing bacteria, is not dependent on additional N  
490 fertilization and can produce high-protein content biomass without fertilizer on poor soils.

491

492

## 493 **Acknowledgements**

494 We thank Andrea Weisert for excellent technical help and Dietmar Haffer for skillfully raising the  
495 plants. We also thank Volker Wissemann and Birgit Gemeinholzer for continuous discussions on the  
496 project. We thank Hermann Finke for his help during visualization.

497

## 498 **References**

499 1. Isobe S, Klimenko I, Ivashuta S, Gau M, Kozlov NN. First RFLP linkage map of red clover (  
500 *Trifolium pratense* L.) based on cDNA probes and its transferability to other red clover  
501 germplasm. *Theor Appl Genet.* 2003; 108: 105–112. doi: 10.1007/s00122-003-1412-z.

- 502 2. Isobe S, Sawai A, Yamaguchi H, Gau M, Uchiyama K. Breeding potential of the backcross  
503 progenies of a hybrid between *Trifolium medium* × *T. pratense* to *T. pratense*. *Can. J. Plant Sci.*  
504 2002; 82: 395–399. doi: 10.4141/P01-034.
- 505 3. Eriksen J, Askegaard M, Sjøgaard K. Complementary effects of red clover inclusion in ryegrass-  
506 white clover swards for grazing and cutting. *Grass Forage Sci.* 2014; 69: 241–250.  
507 doi: 10.1111/gfs.12025.
- 508 4. Young ND, Debellé F, Oldroyd GED, Geurts R, Cannon SB, Udvardi MK, et al. The *Medicago*  
509 genome provides insight into the evolution of rhizobial symbioses. *Nature.* 2011; 480: 520–524.  
510 doi: 10.1038/nature10625.
- 511 5. Sato S, Nakamura Y, Kaneko T, Asamizu E, Kato T, Nakao M, et al. Genome Structure of the  
512 Legume, *Lotus japonicus*. *Theor Appl Genet.* 2008; 15: 227–239. doi: 10.1093/dnares/dsn008.
- 513 6. Schmutz J, Cannon SB, Schlueter J, Ma J, Mitros T, Nelson W, et al. Genome sequence of the  
514 palaeopolyploid soybean. *Nature.* 2010; 463: 178–183. doi: 10.1038/nature08670.
- 515 7. Schmutz J, McClean PE, Mamidi S, Wu GA, Cannon SB, Grimwood J, et al. A reference genome  
516 for common bean and genome-wide analysis of dual domestications. *Nat Genet.* 2014; 46: 707–  
517 713. doi: 10.1038/ng.3008.
- 518 8. Varshney RK, Song C, Saxena RK, Azam S, Yu S, Sharpe AG, et al. Draft genome sequence of  
519 chickpea (*Cicer arietinum*) provides a resource for trait improvement. *Nat Biotechnol.* 2013; 31:  
520 240–246. doi: 10.1038/nbt.2491.
- 521 9. Lonardi S, Muñoz-Amatriaín M, Liang Q, Shu S, Wanamaker SI, Lo S, et al. The genome of  
522 cowpea (*Vigna unguiculata* L. Walp.). *Plant J.* 2019; 98: 767–782. doi: 10.1111/tpj.14349.
- 523 10. Kaur P, Bayer PE, Milec Z, Vrána J, Yuan Y, Appels R, et al. An advanced reference genome of  
524 *Trifolium subterraneum* L. reveals genes related to agronomic performance. *Plant Biotechnol J.*  
525 2017; 15: 1034–1046. doi: 10.1111/pbi.12697.

- 526 11. Dluhošová J, Ištváněk J, Nedělník J, Řepková J. Red Clover (*Trifolium pratense*) and Zigzag Clover  
527 (*T. medium*) - A Picture of Genomic Similarities and Differences. *Front Plant Sci.* 2018; 9: 724.  
528 doi: 10.3389/fpls.2018.00724.
- 529 12. Ištváněk J, Jaros M, Krenek A, Řepková J. Genome assembly and annotation for red clover  
530 (*Trifolium pratense*; Fabaceae). *Am J Bot.* 2014; 101: 327–337. doi: 10.3732/ajb.1300340.
- 531 13. Vega JJ de, Ayling S, Hegarty M, Kudrna D, Goicoechea JL, Ergon Å, et al. Red clover (*Trifolium*  
532 *pratense* L.) draft genome provides a platform for trait improvement. *Sci Rep.* 2015; 5: 17394.  
533 doi: 10.1038/srep17394.
- 534 14. Jahufer MZZ, Ford JL, Widdup KH, Harris C, Cousins G, Ayres JF, et al. Improving white clover for  
535 Australasia. *Crop Pasture Sci.* 2012; 63: 739. doi: 10.1071/CP12142.
- 536 15. Barrett BA, Faville MJ, Nichols SN, Simpson WR, Bryan GT, Conner AJ. Breaking through the feed  
537 barrier: options for improving forage genetics. *Anim. Prod. Sci.* 2015; 55: 883.  
538 doi: 10.1071/AN14833.
- 539 16. Řepková J, Nedělník J. Modern Methods for Genetic Improvement of *Trifolium pratense*. *Czech*  
540 *Journal of Genetics & Plant Breeding.* 2014: 92–99.
- 541 17. Řepková J, Nedělník J. Modern methods for genetic improvement of *Trifolium pratense*. *Czech*  
542 *J. Genet. Plant Breed.* 2014; 50: 92–99. doi: 10.17221/139/2013-CJGPB.
- 543 18. Dias PMB, Julier B, Sampoux J-P, Barre P, Dall’Agnol M. Genetic diversity in red clover (*Trifolium*  
544 *pratense* L.) revealed by morphological and microsatellite (SSR) markers. *Euphytica.* 2008; 160:  
545 189–205. doi: 10.1007/s10681-007-9534-z.
- 546 19. Annicchiarico P, Proietti S. White clover selected for enhanced competitive ability widens the  
547 compatibility with grasses and favours the optimization of legume content and forage yield in  
548 mown clover-grass mixtures. *Grass Forage Sci.* 2010; 140: no-no. doi: 10.1111/j.1365-  
549 2494.2010.00749.x.

- 550 20. Ford JL, Barrett BA. Improving red clover persistence under grazing. Proceedings of the NZ  
551 Grassland Association. 2011; 73: 119–124.
- 552 21. Naydenova G, Hristova T, Aleksiev Y. Objectives and approaches in the breeding of perennial  
553 legumes for use in temporary pastures. Bio Anim Husb. 2013; 29: 233–250.  
554 doi: 10.2298/BAH1302233N.
- 555 22. Tiffin P. Mechanisms of tolerance to herbivore damage: what do we know. Evolutionary  
556 Ecology. 2000; 14: 523–536. doi: 10.1023/A:1010881317261.
- 557 23. Diaz S, Lavorel S, McIntyre SUE, Falczuk V, Casanoves F, Milchunas DG, et al. Plant trait  
558 responses to grazing ? a global synthesis. Global Change Biol. 2007; 13: 313–341.  
559 doi: 10.1111/j.1365-2486.2006.01288.x.
- 560 24. van Minnebruggen A, Roldán-Ruiz I, van Bockstaele E, Haesaert G, Cnops G. The relationship  
561 between architectural characteristics and regrowth in *Trifolium pratense* (red clover). Grass  
562 Forage Sci. 2015; 70: 507–518. doi: 10.1111/gfs.12138.
- 563 25. Herbert DB, Ekschmitt K, Wissemann V, Becker A. Cutting reduces variation in biomass  
564 production of forage crops and allows low-performers to catch up: A case study of *Trifolium*  
565 *pratense* L. (red clover). Plant Biol (Stuttg). 2018; 20: 465–473. doi: 10.1111/plb.12695.
- 566 26. Conaghan P, Casler MD. A theoretical and practical analysis of the optimum breeding system  
567 for perennial ryegrass. Irish Journal of Agricultural and Food Research. 2011; 50: 47–63.
- 568 27. Ortega F, Parra L, Quiroz A. Breeding red clover for improved persistence in Chile: a review.  
569 Crop Pasture Sci. 2014; 65: 1138. doi: 10.1071/CP13323.
- 570 28. Sato S, Isobe S, Asamizu E, Ohmido N, Kataoka R, Nakamura Y, et al. Comprehensive structural  
571 analysis of the genome of red clover (*Trifolium pratense* L.). DNA Res. 2005; 12: 301–364.  
572 doi: 10.1093/dnares/dsi018.



- 573 29. Shimizu-Sato S, Tanaka M, Mori H. Auxin-cytokinin interactions in the control of shoot  
574 branching. *Plant Mol Biol.* 2009; 69: 429–435. doi: 10.1007/s11103-008-9416-3.
- 575 30. Stafstrom J. Influence of Bud Position and Plant Ontogeny on the Morphology of Branch Shoots  
576 in Pea (*Pisum sativum* L. cv. Alaska). *Annals of Botany.* 1995; 76: 343–348.  
577 doi: 10.1006/anbo.1995.1106.
- 578 31. Briske DD, Richards JH. Plant responses to defoliation: a physiological, morphological and  
579 demographic evaluation. In: Bedunah DJ, Sosebee RE, editors. *Wildland plants. Physiological  
580 ecology and developmental morphology.* 1st ed. Denver, Colo.: Society for Range Management;  
581 1995. pp. 635–710.
- 582 32. Kotova LM, Kotov AA, Kara AN. Changes in Phytohormone Status in Stems and Roots after  
583 Decapitation of Pea Seedlings. *Russian Journal of Plant Physiology.* 2004; 51: 107–111.  
584 doi: 10.1023/B:RUPP.0000011309.47328.23.
- 585 33. Li S, Strid Å. Anthocyanin accumulation and changes in CHS and PR-5 gene expression in  
586 *Arabidopsis thaliana* after removal of the inflorescence stem (decapitation). *Plant Physiology  
587 and Biochemistry.* 2005; 43: 521–525. doi: 10.1016/j.plaphy.2005.05.004.
- 588 34. Scholes DR, Wszalek AE, Paige KN. Regrowth patterns and rosette attributes contribute to the  
589 differential compensatory responses of *Arabidopsis thaliana* genotypes to apical damage. *Plant  
590 Biol (Stuttg).* 2016; 18: 239–248. doi: 10.1111/plb.12404.
- 591 35. Fischer M, Bossdorf O, Gockel S, Hänsel F, Hemp A, Hessenmöller D, et al. Implementing large-  
592 scale and long-term functional biodiversity research: The Biodiversity Exploratories. *Basic and  
593 Applied Ecology.* 2010; 11: 473–485. doi: 10.1016/j.baae.2010.07.009.
- 594 36. Asahina M, Satoh S. Molecular and physiological mechanisms regulating tissue reunion in  
595 incised plant tissues. *J Plant Res.* 2015; 128: 381–388. doi: 10.1007/s10265-015-0705-z.

- 596 37. Blazquez MA, Green R, Nilsson O, Sussman MR, Weigel D. Gibberellins promote flowering of  
597 arabidopsis by activating the LEAFY promoter. *Plant Cell*. 1998; 10: 791–800.  
598 doi: 10.1105/tpc.10.5.791.
- 599 38. Bolger AM, Lohse M, Usadel B. Trimmomatic: a flexible trimmer for Illumina sequence data.  
600 *Bioinformatics*. 2014; 30: 2114–2120. doi: 10.1093/bioinformatics/btu170.
- 601 39. Haas BJ, Papanicolaou A, Yassour M, Grabherr M, Blood PD, Bowden J, et al. De novo transcript  
602 sequence reconstruction from RNA-seq using the Trinity platform for reference generation and  
603 analysis. *Nat Protoc*. 2013; 8: 1494–1512. doi: 10.1038/nprot.2013.084.
- 604 40. Grabherr MG, Haas BJ, Yassour M, Levin JZ, Thompson DA, Amit I, et al. Full-length  
605 transcriptome assembly from RNA-Seq data without a reference genome. *Nat Biotechnol*. 2011;  
606 29: 644–652. doi: 10.1038/nbt.1883.
- 607 41. Schulz MH, Zerbino DR, Vingron M, Birney E. Oases: robust de novo RNA-seq assembly across  
608 the dynamic range of expression levels. *Bioinformatics*. 2012; 28: 1086–1092.  
609 doi: 10.1093/bioinformatics/bts094.
- 610 42. Ištváněk J, Dluhošová J, Dluhoš P, Pátková L, Nedělník J, Řepková J. Gene Classification and  
611 Mining of Molecular Markers Useful in Red Clover (*Trifolium pratense*) Breeding. *Front Plant*  
612 *Sci*. 2017; 8. doi: 10.3389/fpls.2017.00367.
- 613 43. Bekel T, Henckel K, Küster H, Meyer F, Mittard Runte V, Neuweger H, et al. The Sequence  
614 Analysis and Management System – SAMS-2.0: Data management and sequence analysis  
615 adapted to changing requirements from traditional sanger sequencing to ultrafast sequencing  
616 technologies. *Journal of Biotechnology*. 2009; 140: 3–12. doi: 10.1016/j.jbiotec.2009.01.006.
- 617 44. Boutet E, Lieberherr D, Tognolli M, Schneider M, Bairoch A. UniProtKB/Swiss-Prot. *Methods*  
618 *Mol Biol*. 2007; 406: 89–112.

- 619 45. Bairoch A, Apweiler R. The SWISS-PROT protein sequence data bank and its supplement  
620 TrEMBL. *Nucleic Acids Res.* 1997; 25: 31–36. doi: 10.1093/nar/25.1.31.
- 621 46. Goodstein DM, Shu S, Howson R, Neupane R, Hayes RD, Fazo J, et al. Phytozome: a comparative  
622 platform for green plant genomics. *Nucleic Acids Res.* 2012; 40: D1178-86.  
623 doi: 10.1093/nar/gkr944.
- 624 47. Wu TD, Watanabe CK. GMAP: a genomic mapping and alignment program for mRNA and EST  
625 sequences. *Bioinformatics.* 2005; 21: 1859–1875. doi: 10.1093/bioinformatics/bti310.
- 626 48. Pérez-Rodríguez P, Riaño-Pachón DM, Corrêa LGG, Rensing SA, Kersten B, Mueller-Roeber B.  
627 PlnTFDB: updated content and new features of the plant transcription factor database. *Nucleic*  
628 *Acids Res.* 2010; 38: D822-7. doi: 10.1093/nar/gkp805.
- 629 49. Li B, Dewey CN. RSEM: accurate transcript quantification from RNA-Seq data with or without a  
630 reference genome. *BMC Bioinformatics.* 2011; 12: 323. doi: 10.1186/1471-2105-12-323.
- 631 50. Love MI, Huber W, Anders S. Moderated estimation of fold change and dispersion for RNA-seq  
632 data with DESeq2. *Genome Biol.* 2014; 15: 550. doi: 10.1186/s13059-014-0550-8.
- 633 51. The UniProt Consortium. UniProt: the universal protein knowledgebase. *Nucleic Acids Res.*  
634 2016; 45: D158-69. doi: 10.1093/nar/gkw1099.
- 635 52. NCBI Resource Coordinators. Database resources of the National Center for Biotechnology  
636 Information. *Nucleic Acids Res.* 2016; 44: D7-19. doi: 10.1093/nar/gkv1290.
- 637 53. Berardini TZ, Reiser L, Li D, Mezheritsky Y, Muller R, Strait E, et al. The Arabidopsis Information  
638 Resource: Making and Mining the ‘Gold Standard’ Annotated Reference Plant Genome.  
639 *Genesis.* 2015; 53: 474–485. doi: 10.1002/dvg.22877.
- 640 54. Altschul SF, Gish W, Miller W, Myers EW, Lipman DJ. Basic local alignment search tool. *Journal*  
641 *of Molecular Biology.* 1990; 215: 403–410. doi: 10.1016/S0022-2836(05)80360-2.

- 642 55. Götz S, García-Gómez JM, Terol J, Williams TD, Nagaraj SH, Nueda MJ, et al. High-throughput  
643 functional annotation and data mining with the Blast2GO suite. *Nucleic Acids Res.* 2008; 36:  
644 3420–3435. doi: 10.1093/nar/gkn176.
- 645 56. Yates SA, Swain MT, Hegarty MJ, Chernukin I, Lowe M, Allison GG, et al. De novo assembly of  
646 red clover transcriptome based on RNA-Seq data provides insight into drought response, gene  
647 discovery and marker identification. *BMC Genomics.* 2014; 15: 453. doi: 10.1186/1471-2164-  
648 15-453.
- 649 57. Pitaksaringkarn W, Ishiguro S, Asahina M, Satoh S. ARF6 and ARF8 contribute to tissue reunion  
650 in incised *Arabidopsis* inflorescence stems. *Plant Biotechnology.* 2014; 31: 49–53.  
651 doi: 10.5511/plantbiotechnology.13.1028b.
- 652 58. Pitaksaringkarn W, Matsuoka K, Asahina M, Miura K, Sage-Ono K, Ono M, et al. XTH20 and  
653 XTH19 regulated by ANAC071 under auxin flow are involved in cell proliferation in incised  
654 *Arabidopsis* inflorescence stems. *Plant J.* 2014; 80: 604–614. doi: 10.1111/tpj.12654.
- 655 59. Salazar-Cerezo S, Martínez-Montiel N, García-Sánchez J, Pérez-y-Terrón R, Martínez-Contreras  
656 RD. Gibberellin biosynthesis and metabolism: A convergent route for plants, fungi and bacteria.  
657 *Microbiological Research.* 2018; 208: 85–98. doi: 10.1016/j.micres.2018.01.010.
- 658 60. Rieu I, Ruiz-Rivero O, Fernandez-Garcia N, Griffiths J, Powers SJ, Gong F, et al. The gibberellin  
659 biosynthetic genes AtGA20ox1 and AtGA20ox2 act, partially redundantly, to promote growth  
660 and development throughout the *Arabidopsis* life cycle. *Plant J.* 2008; 53: 488–504.  
661 doi: 10.1111/j.1365-313X.2007.03356.x.
- 662 61. Spielmeier W, Ellis MH, Chandler PM. Semidwarf (*sd-1*), "green revolution" rice, contains a  
663 defective gibberellin 20-oxidase gene. *Proc Natl Acad Sci U S A.* 2002; 99: 9043–9048.  
664 doi: 10.1073/pnas.132266399.

- 665 62. Achard P, Gusti A, Cheminant S, Alioua M, Dhondt S, Coppens F, et al. Gibberellin Signaling  
666 Controls Cell Proliferation Rate in Arabidopsis. *Current Biology*. 2009; 19: 1188–1193.  
667 doi: 10.1016/j.cub.2009.05.059.
- 668 63. Iuchi S, Suzuki H, Kim Y-C, Iuchi A, Kuromori T, Ueguchi-Tanaka M, et al. Multiple loss-of-  
669 function of Arabidopsis gibberellin receptor AtGID1s completely shuts down a gibberellin signal.  
670 *Plant J*. 2007; 50: 958–966. doi: 10.1111/j.1365-313X.2007.03098.x.
- 671 64. Wang X, Li J, Ban L, Wu Y, Wu X, Wang Y, et al. Functional characterization of a gibberellin  
672 receptor and its application in alfalfa biomass improvement. *Sci Rep*. 2017; 7: 41296.  
673 doi: 10.1038/srep41296.
- 674 65. Thomas SG, Phillips AL, Hedden P. Molecular cloning and functional expression of gibberellin 2-  
675 oxidases, multifunctional enzymes involved in gibberellin deactivation. *Proc Natl Acad Sci U S A*.  
676 1999; 96: 4698–4703. doi: 10.1073/pnas.96.8.4698.
- 677 66. Yamaguchi S. Gibberellin metabolism and its regulation. *Annu Rev Plant Biol*. 2008; 59: 225–  
678 251. doi: 10.1146/annurev.arplant.59.032607.092804.
- 679 67. Curtis IS, Hanada A, Yamaguchi S, Kamiya Y. Modification of plant architecture through the  
680 expression of GA 2-oxidase under the control of an estrogen inducible promoter in Arabidopsis  
681 thaliana L. *Planta*. 2005; 222: 957–967. doi: 10.1007/s00425-005-0037-7.
- 682 68. Sakamoto T, Kobayashi M, Itoh H, Tagiri A, Kayano T, Tanaka H, et al. Expression of a gibberellin  
683 2-oxidase gene around the shoot apex is related to phase transition in rice. *Plant Physiol*. 2001;  
684 125: 1508–1516. doi: 10.1104/pp.125.3.1508.
- 685 69. Ariizumi T, Hauvermale AL, Nelson SK, Hanada A, Yamaguchi S, Steber CM. Lifting della  
686 repression of Arabidopsis seed germination by nonproteolytic gibberellin signaling. *Plant*  
687 *Physiol*. 2013; 162: 2125–2139. doi: 10.1104/pp.113.219451.

- 688 70. Zentella R, Zhang Z-L, Park M, Thomas SG, Endo A, Murase K, et al. Global analysis of della  
689 direct targets in early gibberellin signaling in Arabidopsis. *Plant Cell*. 2007; 19: 3037–3057.  
690 doi: 10.1105/tpc.107.054999.
- 691 71. DeMason DA, Chetty VJ. Interactions between GA, auxin, and UNI expression controlling shoot  
692 ontogeny, leaf morphogenesis, and auxin response in *Pisum sativum* (Fabaceae): or how the  
693 uni-tac mutant is rescued. *Am J Bot*. 2011; 98: 775–791. doi: 10.3732/ajb.1000358.
- 694 72. Nelissen H, Gonzalez N, Inzé D. Leaf growth in dicots and monocots: so different yet so alike.  
695 *Curr Opin Plant Biol*. 2016; 33: 72–76. doi: 10.1016/j.pbi.2016.06.009.
- 696 73. Guttridge CG, Thombsen PA. The Effect of Gibberellins on Growth and Flowering of *Fragaria*  
697 and *Duchesnea*. *J Exp Bot*. 1964; 15: 631–646. doi: 10.1093/jxb/15.3.631.
- 698 74. Leite VM, Rosolem CA, Rodrigues JD. Gibberellin and cytokinin effects on soybean growth. *Sci*.  
699 *agric. (Piracicaba, Braz.)*. 2003; 60: 537–541. doi: 10.1590/S0103-90162003000300019.
- 700 75. Tsukaya H, Kozuka T, Kim G-T. Genetic control of petiole length in *Arabidopsis thaliana*. *Plant*  
701 *Cell Physiol*. 2002; 43: 1221–1228. doi: 10.1093/pcp/pcf147.
- 702 76. Hisamatsu T, King RW, Helliwell CA, Koshioka M. The involvement of gibberellin 20-oxidase  
703 genes in phytochrome-regulated petiole elongation of *Arabidopsis*. *Plant Physiol*. 2005; 138:  
704 1106–1116. doi: 10.1104/pp.104.059055.
- 705 77. Cai Y, Shao L, Li X, Liu G, Chen S. Gibberellin stimulates regrowth after defoliation of sheepgrass  
706 (*Leymus chinensis*) by regulating expression of fructan-related genes. *J Plant Res*. 2016; 129:  
707 935–944. doi: 10.1007/s10265-016-0832-1.
- 708 78. Morvan-Bertrand A, Ernstsen A, Lindgard B, Koshioka M, Le Saos J, Boucaud J, et al.  
709 Endogenous gibberellins in *Lolium perenne* and influence of defoliation on their contents in  
710 elongating leaf bases and in leaf sheaths. *Physiol Plant*. 2001; 111: 225–231.  
711 doi: 10.1034/j.1399-3054.2001.1110214.x.

## 712 **Supplement Figures**

713 Figure S1: Annotation Overview: A: Distribution of transcripts that could be mapped to the *T.*  
714 *pratense* genome, to a known locus and were annotated with *T. pratense* genome identifier. B:  
715 Distribution of transcripts that could be mapped to an unknown *T. pratense* gene locus. C:  
716 Distribution of transcripts that could not be mapped o the *T. pratense* genome. D: Distribution of  
717 transcripts of whole transcriptome representing all 12 libraries.

718 Figure S2 Differential expression of putative transcription factors of *T. pratense*. The Y axis denotes  
719 the number of expressed TF family members, the x axis shows the treatments and TF families.  
720 Orange bars indicate that >10% of the TF members are differentially expressed between the  
721 treatments, the red bars indicates that >5% are differentially expressed.

722 Figure S3: Plant architectural characteristics and growth habit of GA treated plants. A-E Measured,  
723 counted or calculated plant characteristics during phenotypic monitoring experiments. GA treated  
724 plants, blue; control plants, orange. Graphs show average values and 95% confidence intervals. Time  
725 is shown in weeks. Growth habit of control plants (left side) vs GA treated plants (right side), after  
726 approximately 2 weeks of GA treatment and regrowth (F), and after 4 weeks (G).

727

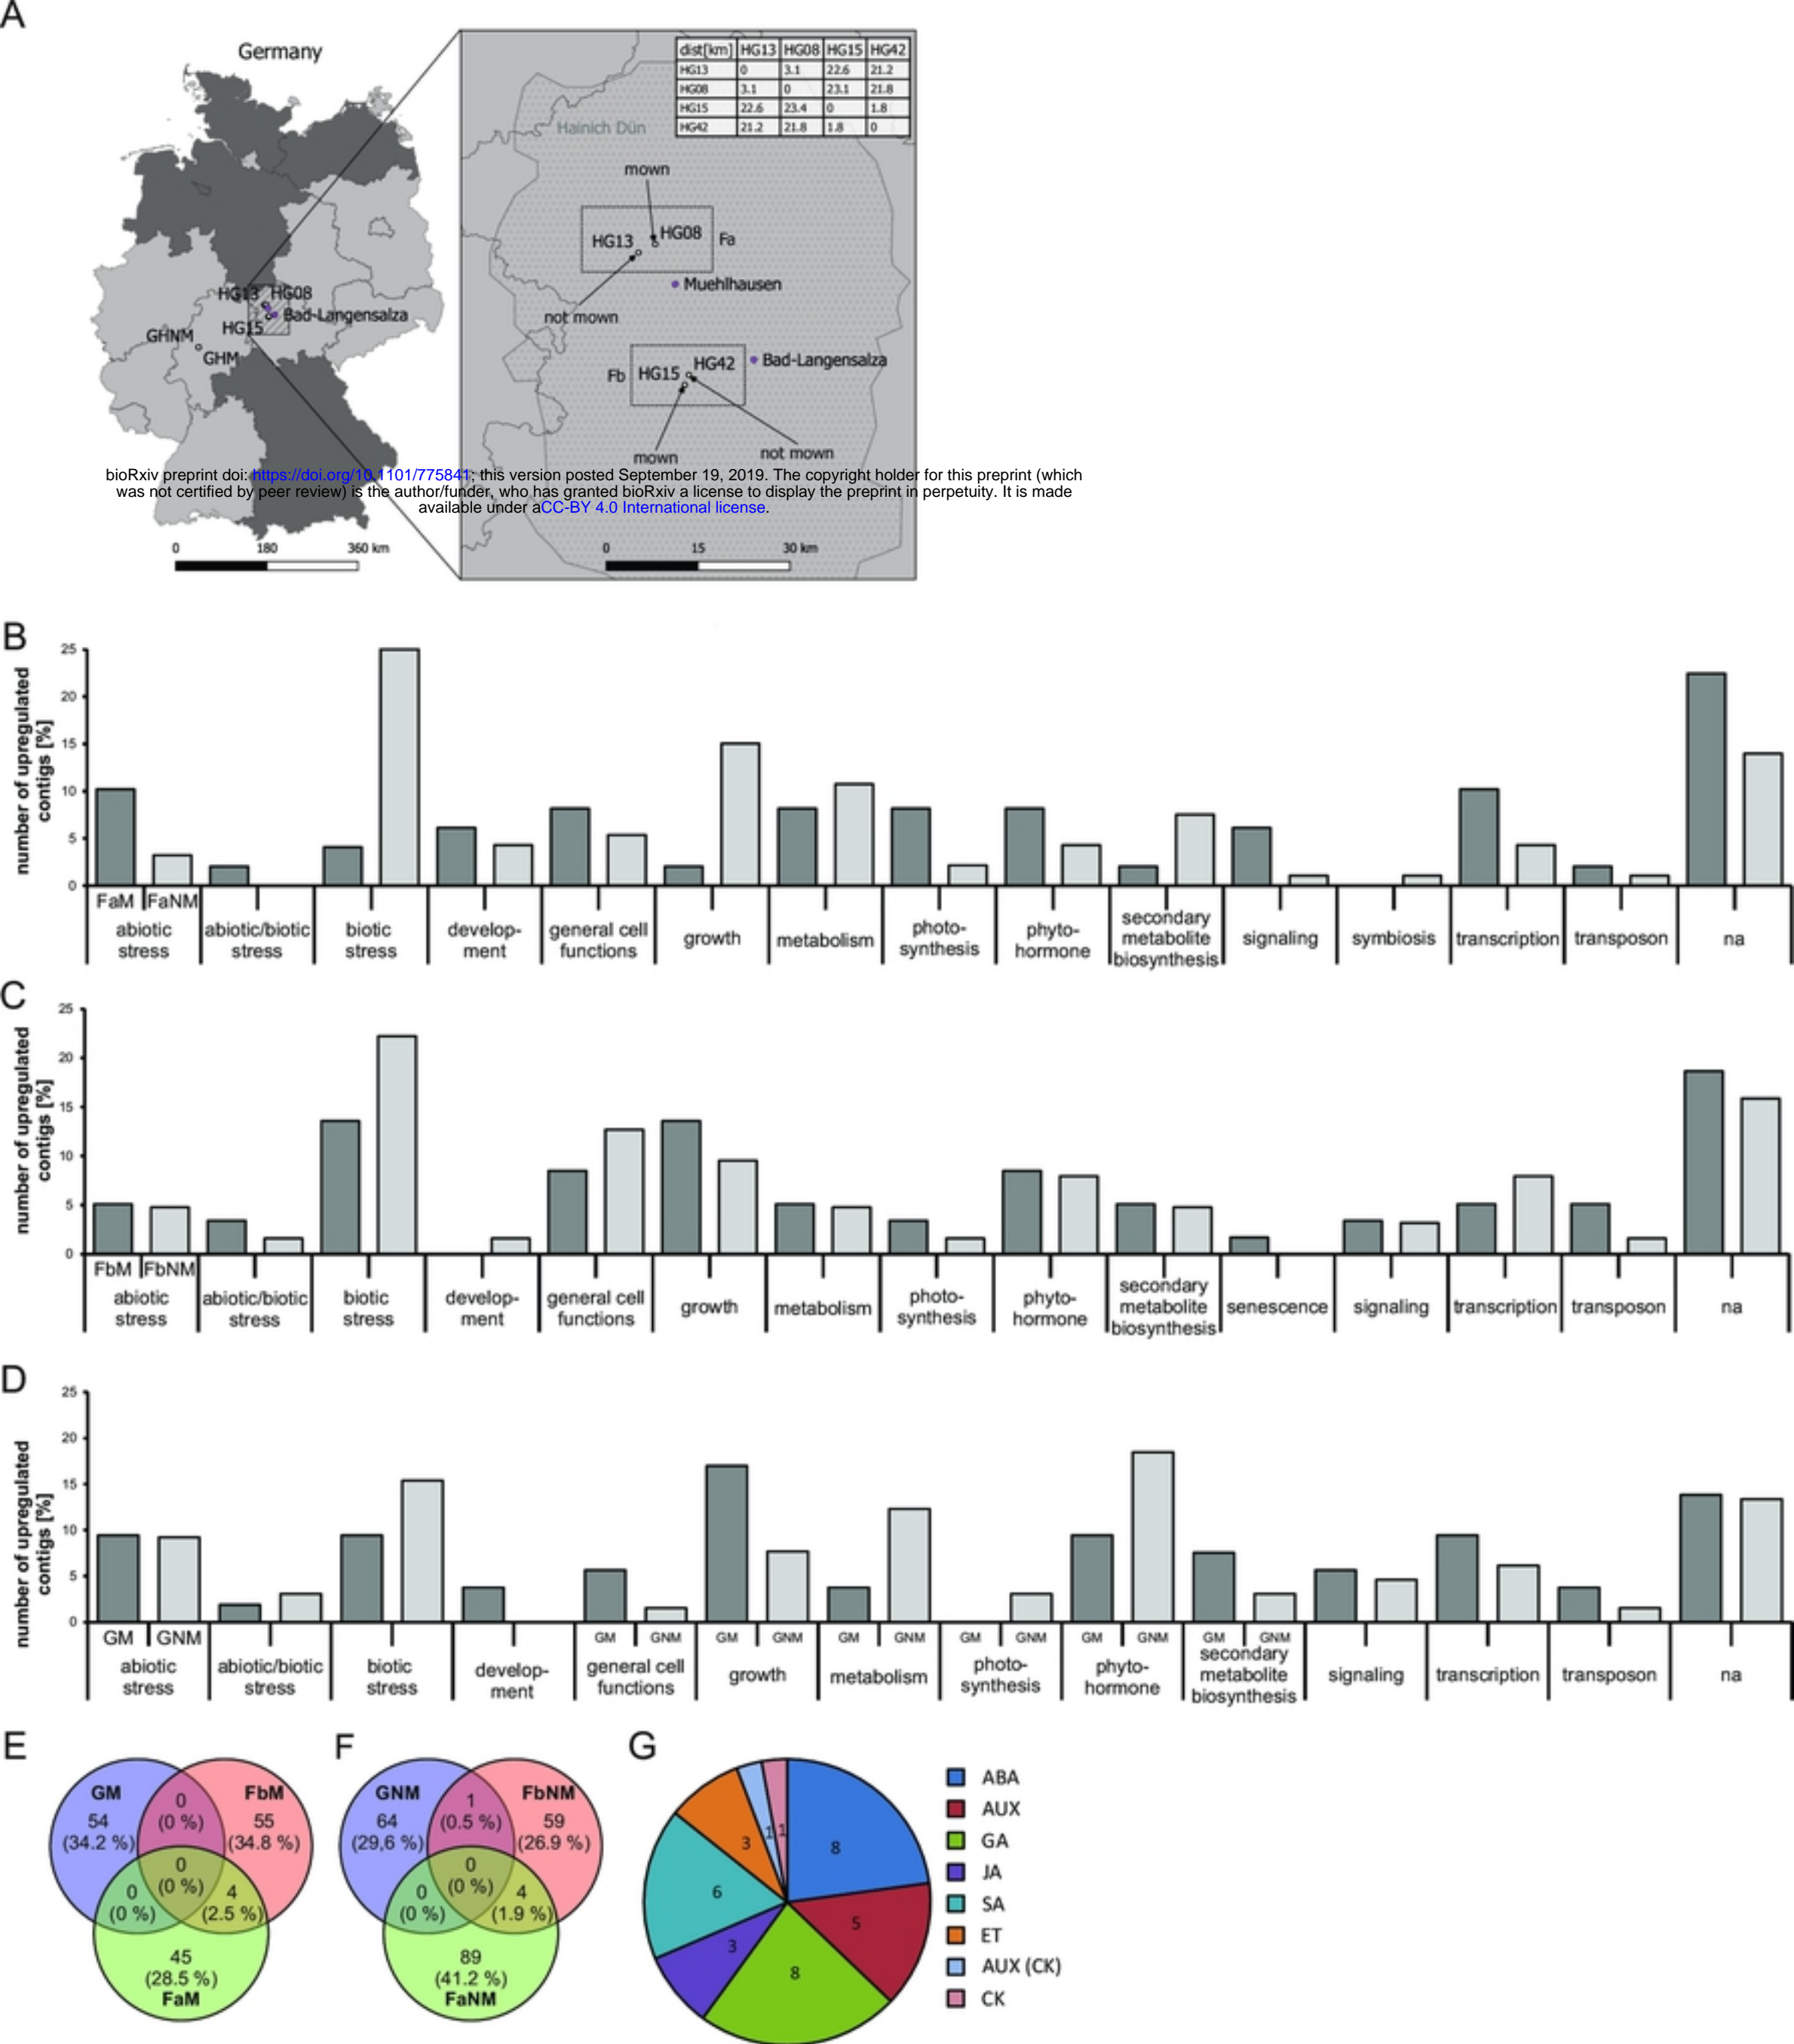

Figure 1



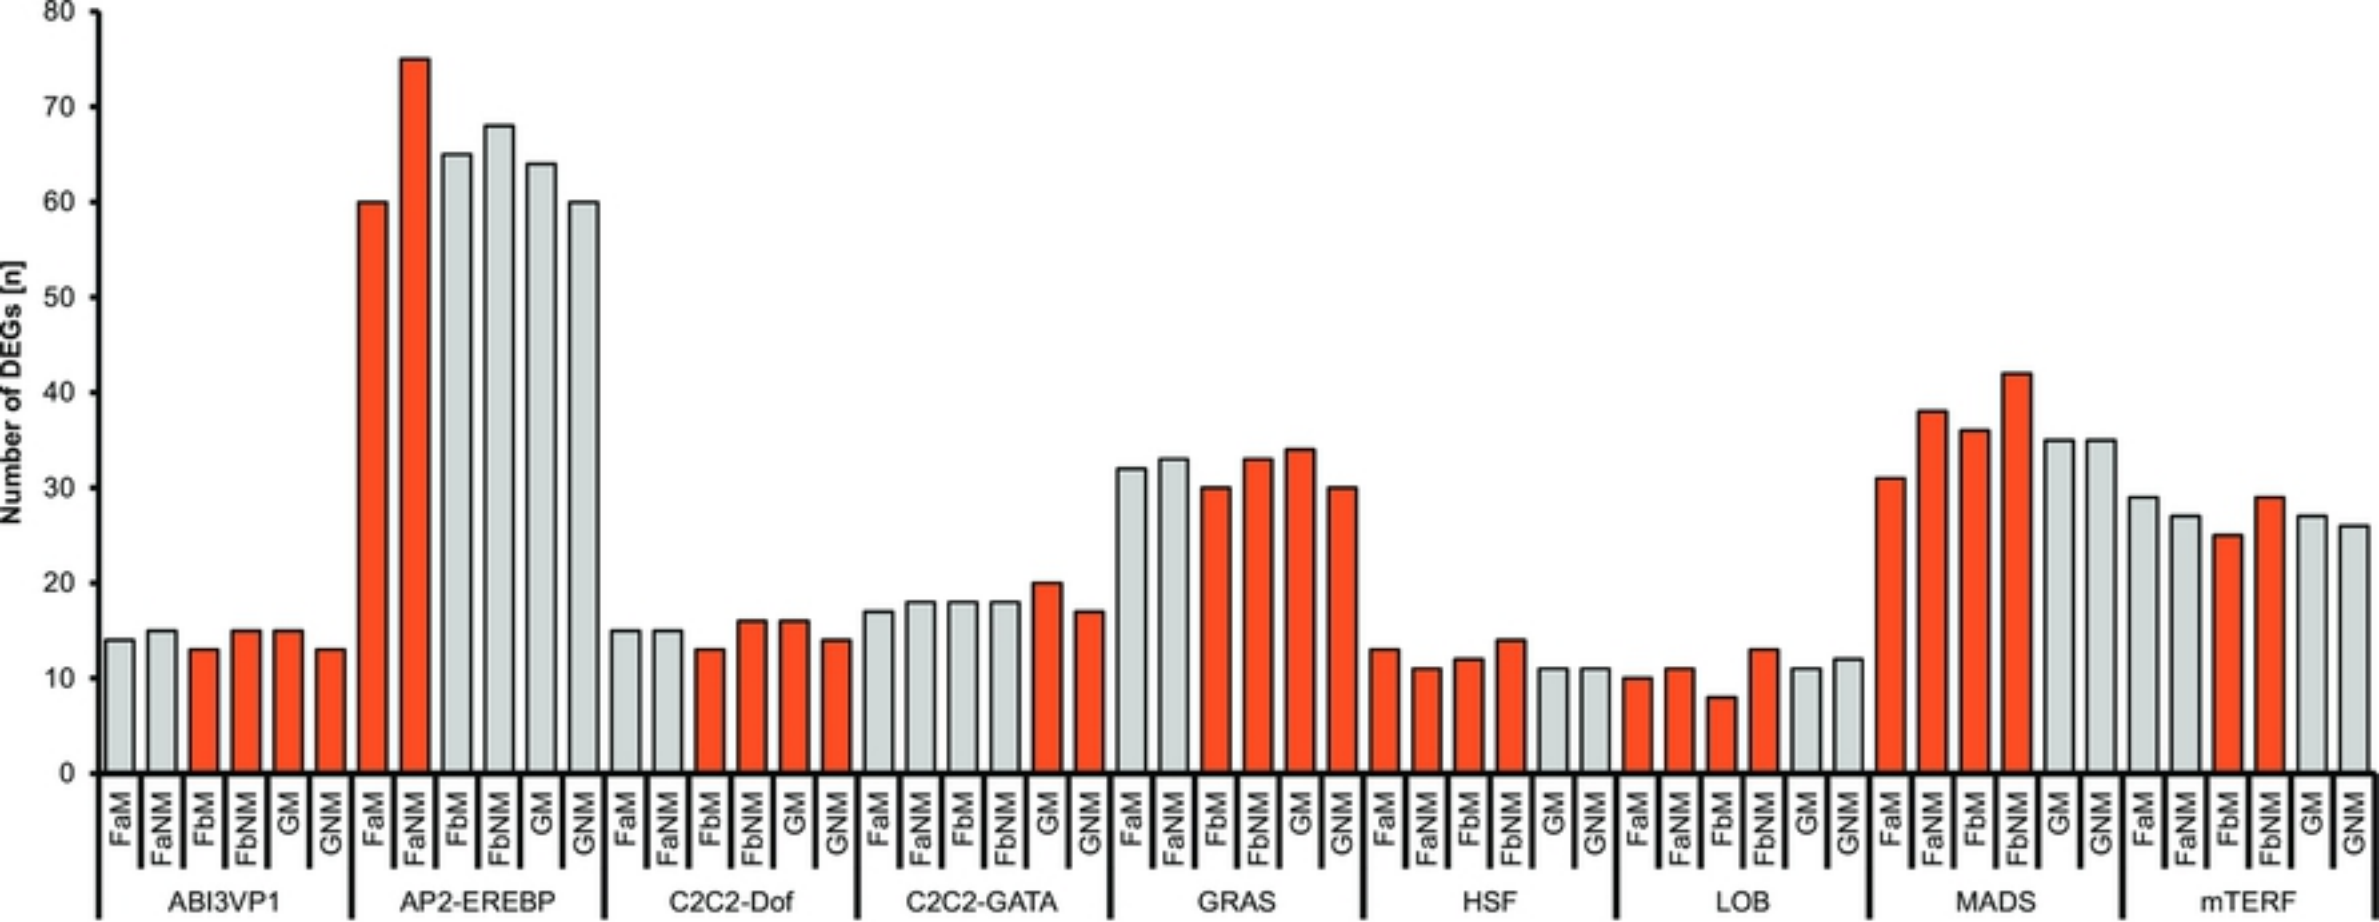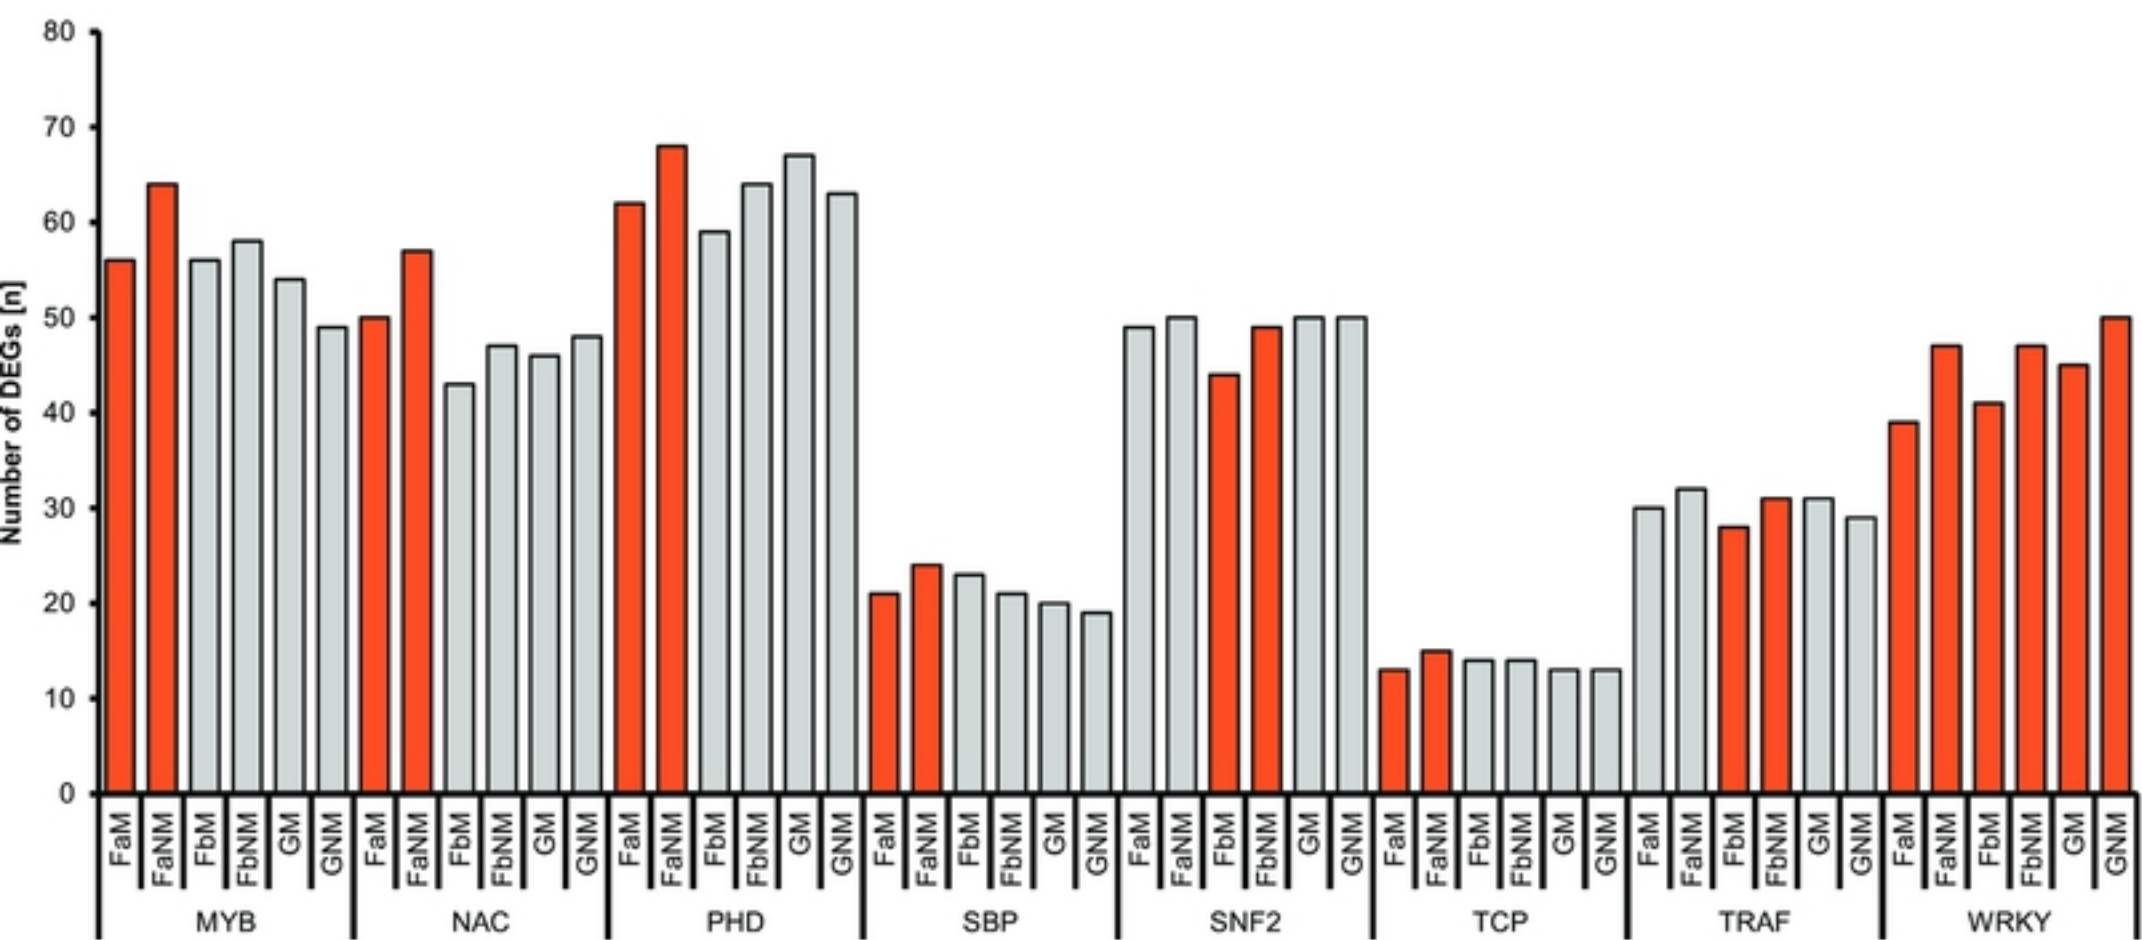

Figure 2

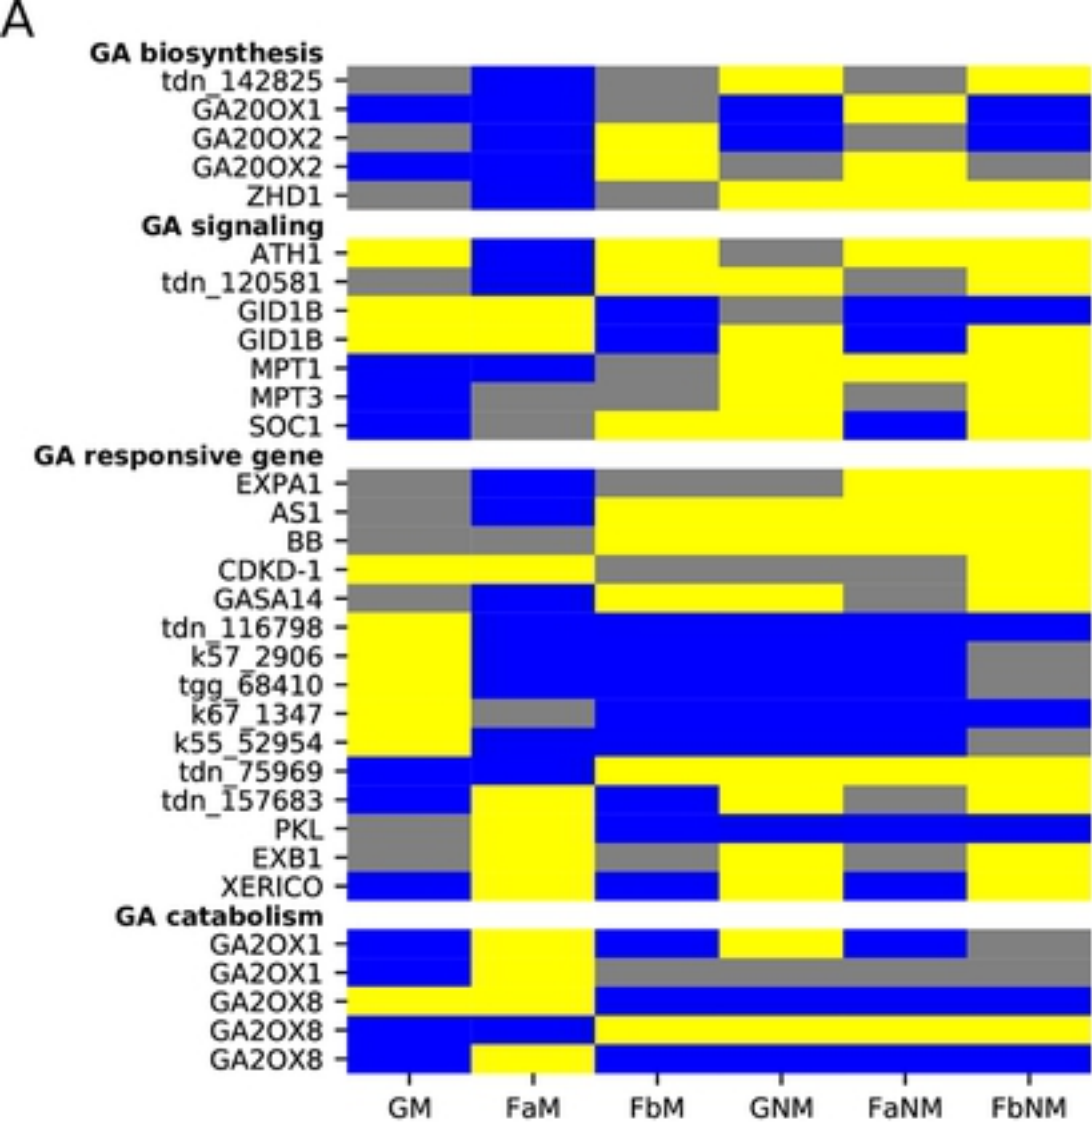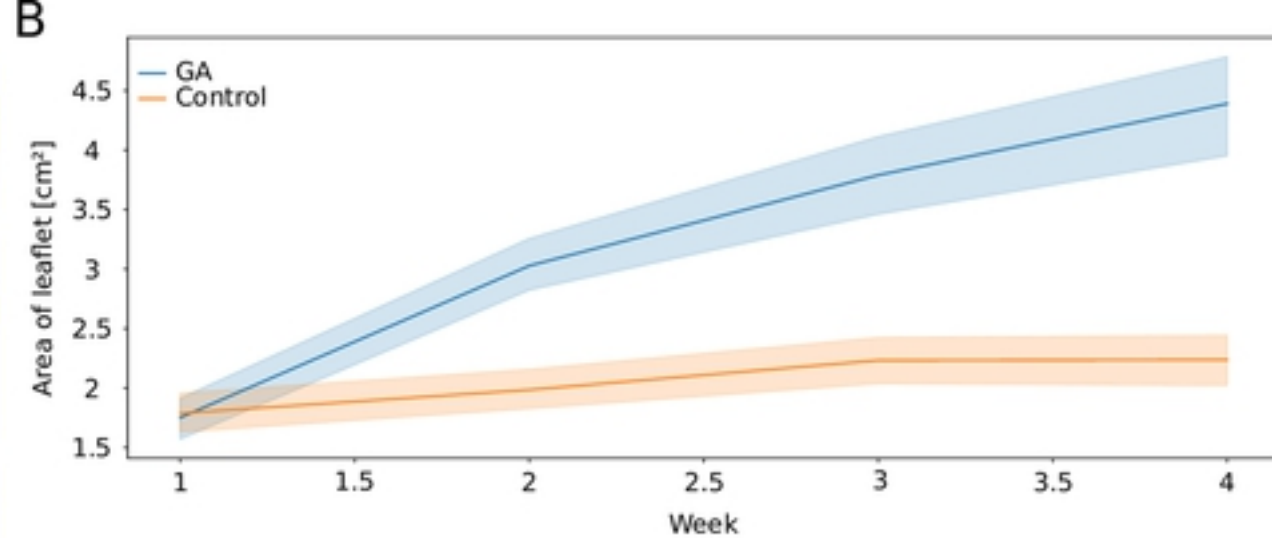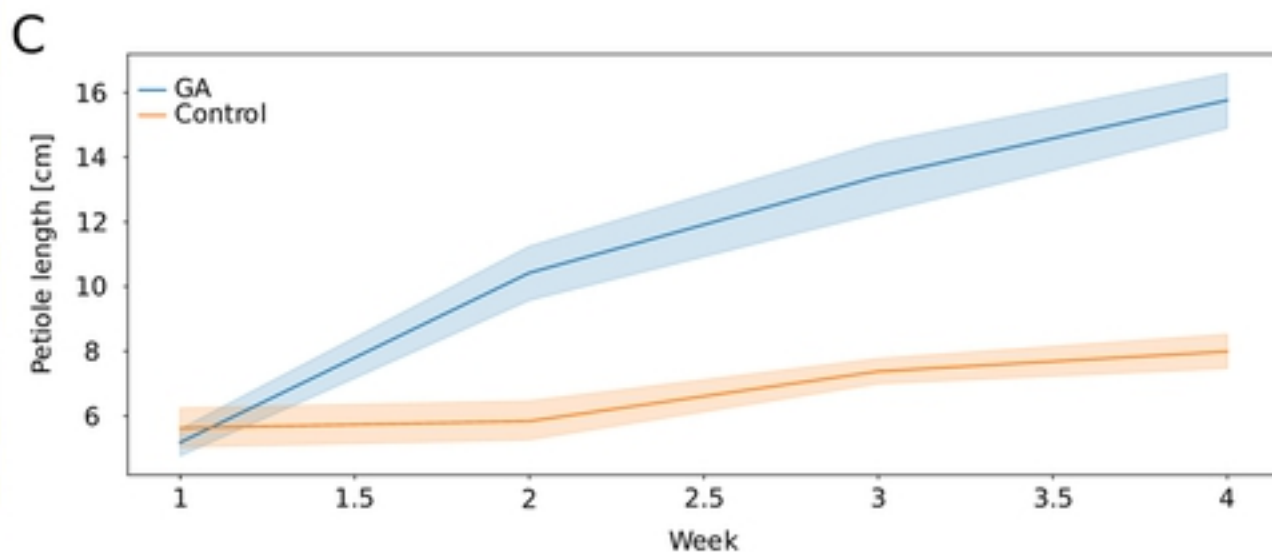

Figure 3
